1 **Landscapes and bacterial signatures of mucosa-associated**  
2 **intestinal microbiota in Chilean and Spanish patients with**  
3 **inflammatory bowel disease**

4

5 Nayaret Chamorro<sup>1\*</sup>, David A. Montero<sup>1,2\*</sup>, Pablo Gallardo<sup>3</sup>, Mauricio Farfán<sup>3</sup>, Mauricio  
6 Contreras<sup>4</sup>, Marjorie De la Fuente<sup>2</sup>, Karen Dubois<sup>2</sup>, Marcela A. Hermoso<sup>2</sup>, Rodrigo  
7 Quera<sup>5,6</sup>, Marjorie Pizarro-Guajardo<sup>7,8,9</sup>, Daniel Paredes-Sabja<sup>7,8,9</sup>, Daniel Ginard<sup>10</sup>,  
8 Ramon Rosselló-Móra<sup>11</sup>, Roberto Vidal<sup>1,8,12\*\*</sup>

9

10 <sup>1</sup> Programa de Microbiología y Micología, Instituto de Ciencias Biomédicas, Facultad  
11 de Medicina, Universidad de Chile, Chile

12 <sup>2</sup> Programa de Inmunología, Instituto de Ciencias Biomédicas, Facultad de Medicina,  
13 Universidad de Chile, Chile.

14 <sup>3</sup> Facultad de Medicina, Departamento de Pediatría y Cirugía Infantil, Campus Oriente-  
15 Hospital Dr. Luis Calvo Mackenna, Universidad de Chile, Chile.

16 <sup>4</sup> Facultad de Ciencias, Departamento de Física, Universidad Metropolitana de  
17 Ciencias de la Educación, Santiago, Chile.

18 <sup>5</sup> Programa Enfermedad Inflamatoria Intestinal. Servicio de Gastroenterología, Clínica  
19 Las Condes, Santiago, Chile

20 <sup>6</sup> Gastroenterología, Clínica Universidad de Los Andes, Santiago, Chile

21 <sup>7</sup> Microbiota-Host Interactions and Clostridia Research Group, Departamento de  
22 Ciencias Biológicas, Facultad de Ciencias de la Vida, Universidad Andrés Bello,  
23 Santiago, Chile.

24 <sup>8</sup> ANID - Millennium Science Initiative Program - Millennium Nucleus in the Biology of  
25 Intestinal Microbiota, Santiago, Chile.

26 <sup>9</sup> Department of Biology, Texas A&M University, College Station, TX, 77843, USA

27 <sup>10</sup> Department of Gastroenterology and Palma Health Research Institute, Hospital  
28 Universitario Son Espases, Palma de Mallorca, Spain.

29 <sup>11</sup> Grupo de Microbiología Marina, IMEDEA (CSIC-UIB), Esporles, Illes Balears, Spain

30 <sup>12</sup> Instituto Milenio de Inmunología e Inmunoterapia, Facultad de Medicina, Universidad  
31 de Chile, Chile

32

33 \* These authors contributed equally. \*\* Corresponding author. Correspondence should  
34 be addressed to Roberto Vidal (email: [rvidal@uchile.cl](mailto:rvidal@uchile.cl))

35

36

37

38

39

40

41

42

43

44

45

46

47

48 **RUNNING TITLE:** Mucosa-associated intestinal microbiota in IBD

49

50 **KEYWORDS:** Mucosa-associated intestinal microbiota, Inflammatory bowel disease,  
51 Ulcerative Colitis, Crohn's Disease, Microbiome, Bacterial biomarkers, Dysbiosis.

1    **ABSTRACT**

2    Inflammatory bowel diseases (IBD), which include ulcerative colitis (UC) and Crohn's  
3    disease (CD), cause chronic inflammation of the gut, affecting millions of people  
4    worldwide. IBD have been frequently associated with an alteration of the gut microbiota,  
5    termed dysbiosis, which is generally characterized by an increase in abundance of  
6    Proteobacteria such as *Escherichia coli*, and a decrease in abundance of Firmicutes  
7    such as *Faecalibacterium prausnitzii* (an indicator of a healthy colonic microbiota). The  
8    mechanisms behind the development of the IBD and the dysbiosis are incompletely  
9    understood. Using samples from colonic biopsies, we studied the mucosa-associated  
10   intestinal microbiota in Chilean and Spanish patients with IBD. In agreement with  
11   previous studies, microbiome comparison between IBD patients and non-IBD controls  
12   indicated that dysbiosis in these patients is characterized by an increase of pro-  
13   inflammatory bacteria (mostly Proteobacteria) and a decrease of commensal beneficial  
14   bacteria (mostly Firmicutes). Notably, bacteria typically residing on the mucosa of healthy  
15   individuals were mostly obligate anaerobes, whereas in the inflamed mucosa an increase  
16   of facultative anaerobe and aerobic bacteria was observed. We also identify potential  
17   co-occurring and mutually exclusive interactions between bacteria associated with the  
18   healthy and inflamed mucosa, which appear to be determined by the oxygen availability  
19   and the type of respiration. Finally, we identify a panel of bacterial biomarkers that allow  
20   the discrimination between eubiosis from dysbiosis with a high diagnostic performance  
21   (96% accurately), which could be used for the development of non-invasive diagnostic  
22   methods. Thus, this study is a step forward toward understanding the landscapes and  
23   alterations of mucosa-associated intestinal microbiota in patients with IBD.

24  
25  
26  
27  
28  
29  
30  
31  
32  
33  
34  
35  
36  
37

## 1 INTRODUCTION

2 The intestinal microbiota plays a key role in human health, providing important metabolic  
3 functions, stimulating the immune system, acting as a barrier to pathogenic organisms,  
4 and regulating body composition [1, 2]. Changes in microbiota structure or dysbiosis  
5 have been associated with alterations in diet [3], chronic stress [4], antibiotic use and a  
6 number of gastrointestinal disorders [5–10], such as the inflammatory bowel disease  
7 (IBD) [11, 12]. Within IBD phenotypes, ulcerative colitis (UC) and Crohn's disease (CD)  
8 have a clinical impact worldwide, with UC characterized by inflammation of the rectum,  
9 extending diffusely towards the colon, whereas CD is characterized by systemic  
10 inflammation and ulcers affecting any part of the gastrointestinal tract and thickening of  
11 the intestinal wall. Since 1990, the incidence of IBD has increase in Africa, Asia and  
12 South America [13]; although no data are available in Chile, clinical experience shows  
13 an increase in recent years in the number of consultations by IBD patients [14, 15].

14  
15 While the etiological causes of UC and CD remain unidentified, several factors are known  
16 to increase susceptibility, including: i) genetic polymorphisms [16–18]; ii) altered immune  
17 response [19, 20] iii) environmental factors [21–23]; and (iv) alteration of the gut  
18 microbiota composition [24–29].

19  
20 In general, studies of the gut microbial composition of patients with UC and CD have  
21 shown an increase in the phylum Proteobacteria and a decrease in the phylum  
22 Firmicutes [30, 31]. Most of these studies have mainly analyzed stool samples. However,  
23 many differences between the microbial communities from fecal and mucosal samples  
24 have been reported, indicating that fecal microbial communities do not accurately  
25 represent the local communities that live in specific regions of the gut (colon, ileus and  
26 small intestine) [20, 32–34]. In addition, most of these studies are based on the massive  
27 sequencing of amplicons of the 16S rRNA gene and the clustering of reads into  
28 operational taxonomic units (OTUs), using short sequences of variable regions of the  
29 gene [35, 36]. The short size of the amplicons (<300 nt) only allows the identification up  
30 to the family level or in some cases genus.

31  
32 In the present study, we investigated the mucosa-associated intestinal microbiota in  
33 Chilean and Spanish patients with IBD. For this, we amplified the 16S rRNA gene and  
34 obtained sequence libraries from colonic mucosa biopsies using high-quality reads of  
35 more than 300 nucleotides for the bacterial affiliation process. In addition, we used the  
36 OPU (Operational Phylogenetic Unit) approach for taxonomic assignment, as this allows  
37 for better bacterial identification, in most cases reaching the species level [37]. OPU

1 analysis is not based on strict identity thresholds; instead, sequences are affiliated with  
2 a phylogenetic tree using the parsimony algorithm followed by manual supervision of the  
3 tree to design meaningful phylogenetic units [38]. Since identification is based on  
4 phylogenetic inference, OPUs are based on the genealogical signal of the sequences,  
5 which minimizes the influence of errors and size differences. An OPU is the smallest  
6 monophyletic group of sequences containing OTU representatives together with the  
7 closest reference sequence, including the sequence of a type strain when possible [39].  
8 To date, there have been no reports on the microbiome of patients with UC at the OPU  
9 level.

10  
11 Our results indicate that dysbiosis is not a common feature among IBD patients.  
12 However, in IBD patients where gut dysbiosis was present, we found an increase in pro-  
13 inflammatory bacteria (mostly Proteobacteria) and a decrease in beneficial commensal  
14 bacteria (mostly Firmicutes). We also identified potential co-occurring and mutually  
15 exclusive interactions between bacteria associated with the healthy and inflamed  
16 mucosa, which appear to be determined by oxygen availability and the type of  
17 respiration. Importantly, these results were consistent with the “Oxygen Hypothesis”,  
18 which states that chronic inflammation induces increased oxygen levels in the gut,  
19 leading to an imbalance between obligate and facultative anaerobes [28]. Finally, we  
20 identified bacterial biomarkers that could be used for the development of non-invasive  
21 diagnostic methods, such as real-time PCR. A future goal is that an early detection of  
22 changes in the gut microbiota could allow the initiation of IBD treatment or preventive  
23 measures.

1  
2  
3  
4  
5  
6  
7  
8  
9  
10  
11  
12  
13  
14  
15  
16  
17  
18  
19  
20  
21  
22  
23  
24  
25  
26  
27  
28  
29  
30  
31  
32  
33  
34  
35  
36  
37

## RESULTS

Here we focused on two independent cohorts of patients with IBD from Chile and Spain. Both cohorts were adults and included patients diagnosed with UC or CD. In addition, control individuals (CTL; Non-IBD controls) who underwent colonoscopy due to a family history of colon cancer were included. All samples were colonic mucosal biopsies. Patients who received antibiotic treatment within one month prior to the colonoscopy were excluded. The Chilean cohort included 20 and 21 patients with UC and CD, respectively, and 5 control individuals. The Spanish cohort was previously reported by Vidal et al., 2015 [37], of which we included 13 patients with CD and also, 7 control individuals. The clinical features of the patients are described in Table S1. For both cohorts, microbial composition in colonic biopsies were assessed by DNA extraction followed by 16S rRNA gene pyrosequencing, as described in the Materials and Methods section.

Pyrosequencing of Chilean samples generated 331,677 reads, which together with the Spanish samples generated a total of 483,818 reads with a mean of 5,506 reads per sample (Table S2). The average read length for 16S rRNA sequences was 649 bp. The OTUs from Chilean samples were clustered and inserted into the tree by Vidal et al., 2015 [37]. OTUs that were not clustered as part of known OPUs were re-evaluated and designated anew. This resulted in a total of 608 OPUs, with a mean of 88 OPUs per sample (Table S2). Notably, our results show that the OPU rarefaction curves approached saturation with a significantly lower number of reads than necessary for the OTU curves, indicating an overestimation of taxonomic units (diversity) when using a traditional OTU approach (Figure 1A).

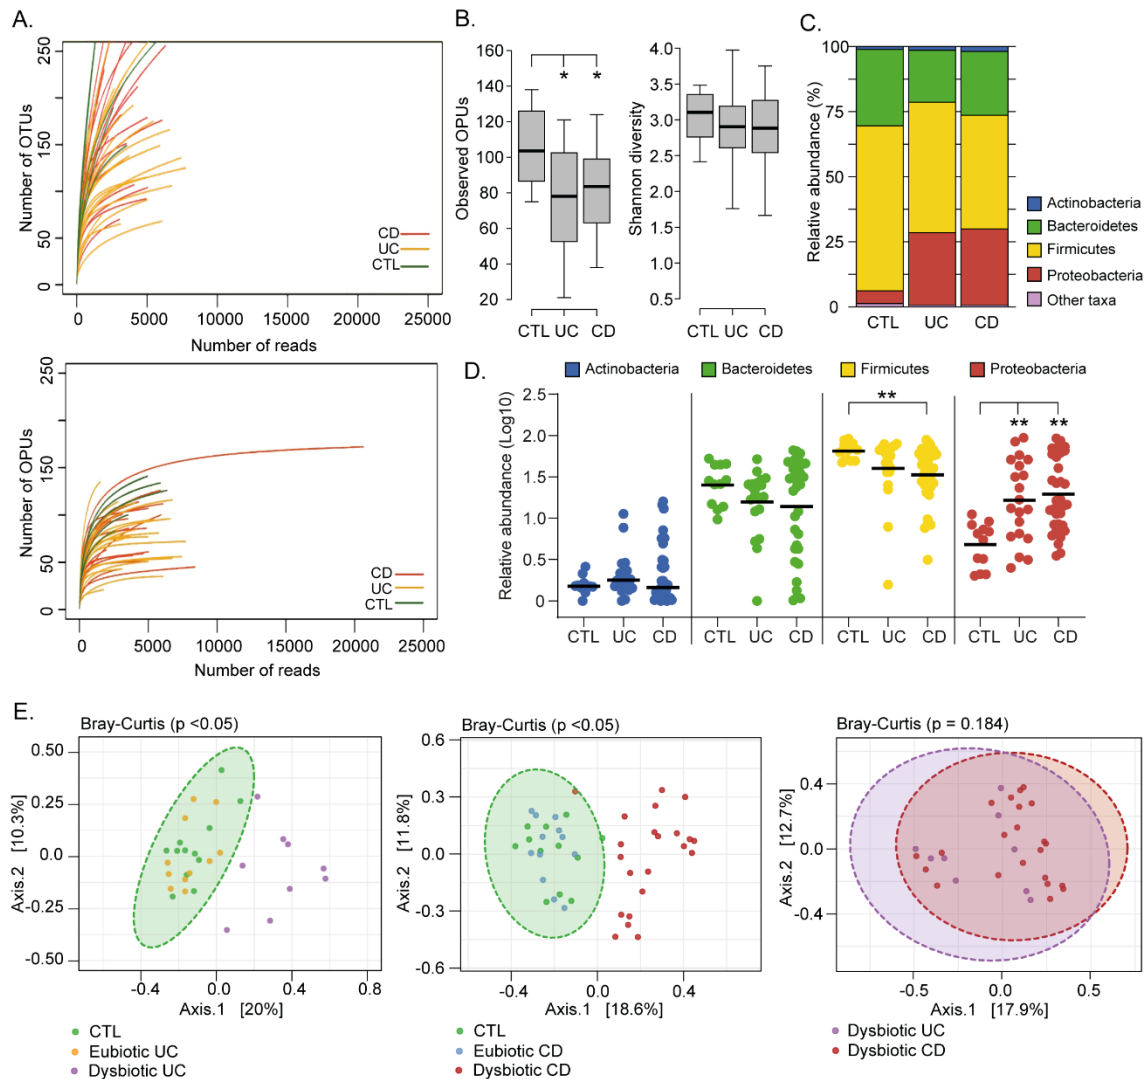

1  
2  
3  
4  
5  
6  
7  
8  
9  
10  
11  
12  
13  
14  
15  
16  
17  
18  
19  
20  
21  
22

**FIGURE 1. Landscape of mucosa-associated intestinal microbiota of Chilean and Spanish patients with IBD.** (A) Rarefaction curves based on OTUs and OPUs detected in colonic biopsies from patients with ulcerative colitis (UC; orange lines) and Crohn's Disease (CD; red lines), and control individuals (CTL; green lines). (B) Alpha diversity between patients and control individuals determined by the observed OPUs (Richness) and the Shannon index (Diversity). Significance: \*  $p < 0.05$ , Kruskal-Wallis & Dunn's tests. (C) Relative abundances (%) of the most prevalent phyla. Phyla with abundances  $< 1\%$  are represented as other taxa. (D) Comparison of the relative abundances (Log10) of the four most common phyla. Each data point corresponds to a sample and horizontal lines to the means. Significance: \*\*  $p < 0.005$ , Kruskal-Wallis & Dunn's tests. (E) A set of principal coordinate analysis (PCoA) plots based on Bray-Curtis distances showing the overall composition (beta diversity) of the microbiota in patients and controls. For a better visualization, individual PCoA plots are shown for the analysis of UC patients versus controls (left panel), CD patients versus controls (middle panel) and dysbiotic UC versus dysbiotic CD patients. Each data point corresponds to a sample, which is colored according to the disease phenotype and the microbiota status (dysbiotic or eubiotic). Ellipses represent a 95% CI around the cluster centroid.

## 1 **Gut microbial dysbiosis is not a common feature among IBD patients**

2 Differences in the gut microbiota of IBD patients compared to healthy individuals have  
3 been widely reported [40–43]. Among IBD patients there may be several degrees and  
4 profiles of dysbiosis, which have been correlated with the phenotype and severity of the  
5 disease [35, 37, 44], and gastrointestinal surgery [45, 46]. Therefore, we first assessed  
6 the landscape, richness, and diversity of the mucosa-associated intestinal microbiota  
7 among patients and non-IBD controls. In general, we found that UC and CD patients  
8 have significantly lower richness (Observed OPU) than the controls. However, no  
9 significant differences in the alpha diversity (Shannon diversity) were observed (Fig. 1B).

10

11 Four major bacterial phyla (Firmicutes, Bacteroidetes, Proteobacteria and  
12 Actinobacteria) dominate the gut microbiota of humans [33]. Accordingly, almost all  
13 OPUs identified were affiliated with one of these phyla. In general, we observed that UC  
14 and CD patients have a lower abundance of Firmicutes and a higher abundance of  
15 Proteobacteria (Fig. 1C and 1D). Interestingly, a principal coordinate analysis (PCoA)  
16 based on the Bray-Curtis dissimilarity showed that only some patients have a significant  
17 shift in beta diversity (dysbiosis) compared to the controls (Fig. 1E). This result suggests  
18 that some patients (dysbiotic UC and CD patients) but not all (eubiotic UC and CD  
19 patients) have an alteration in their mucosa-associated intestinal microbiota. Of note,  
20 there were no significant differences in beta diversity between dysbiotic patients that  
21 clustered away from control individuals, suggesting they have a similar imbalance in their  
22 microbiota.

23

24 Based on the PCoA analysis and the IBD phenotype, patients were subdivided into four  
25 groups: UC1, UC2, CD1 and CD2 (Table S1). Consistent with this subclassification,  
26 hierarchical clustering using the relative abundances of the 608 OPUs across all samples  
27 showed that UC1, CD1 and controls clustered together but away from UC2 and CD2  
28 (Fig. 2A). Moreover, relative abundances per patient at the phylum level clearly showed  
29 that while UC1, CD1 and controls have a similar taxonomic composition, UC2 and CD2  
30 have a dysbiosis characterized by an increase in Proteobacteria and a decrease in  
31 Firmicutes (Fig. 2B). As expected, UC1 and CD1 showed a richness and diversity similar  
32 to the controls. By contrast, UC2 and CD2 had significantly lower richness than the  
33 controls, but only CD2 showed a lower alpha diversity (Fig. 2C). Thus, collectively these  
34 results indicate variability in the mucosa-associated intestinal microbiota among IBD  
35 patients: while some patients have a dysbiotic microbiota, others have a microbiota  
36 composition similar to that of the non-IBD controls.

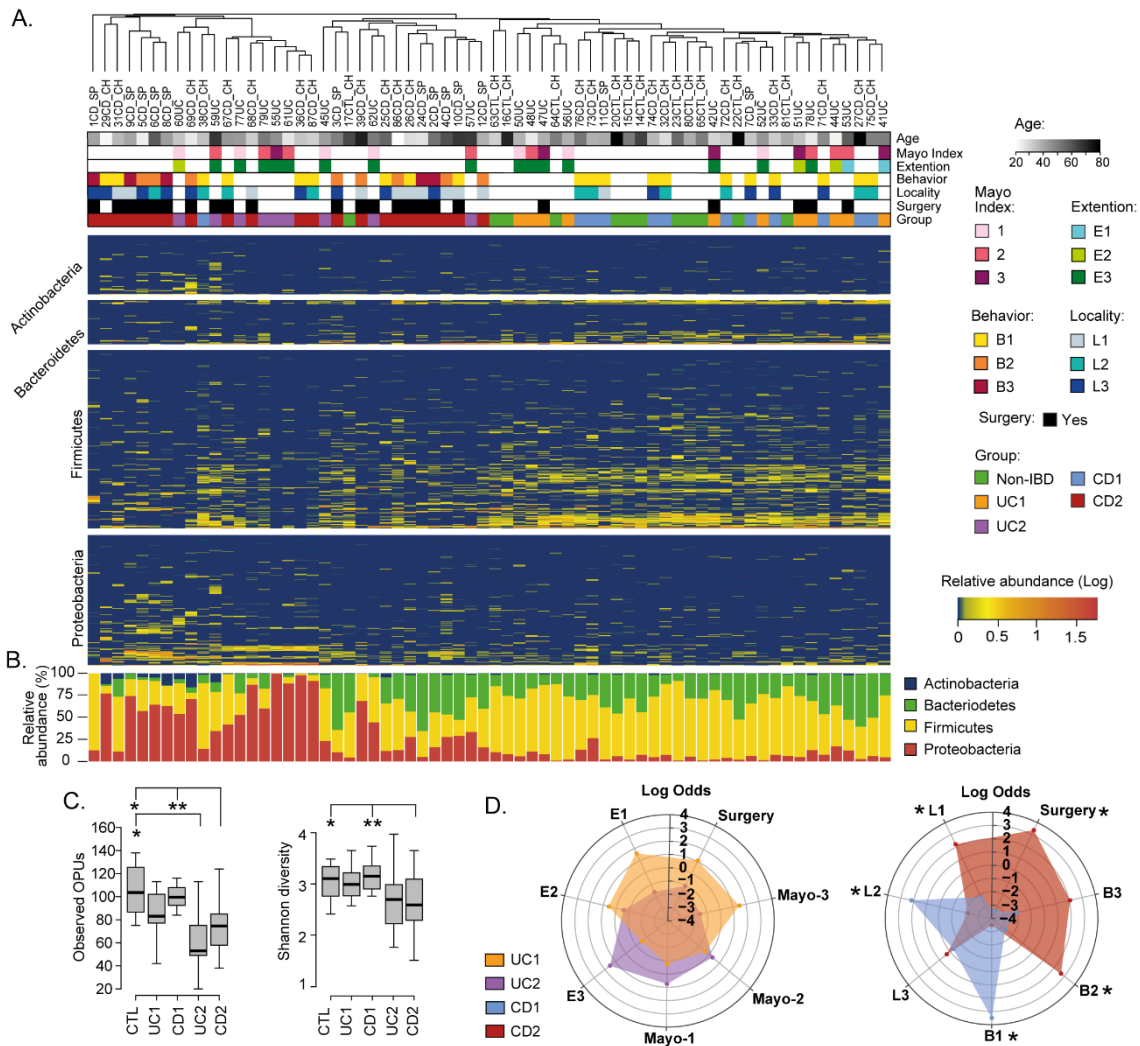

**FIGURE 2. Compositional differences in the mucosa-associated intestinal microbiota among IBD patients. (A)** Clustering of patients and controls and heatmap of OPU abundances. Patients (Columns) were grouped based on a hierarchical cluster analysis using relative abundances of 608 OPU. OPU of the four most abundant phyla are shown in the rows, and their relative abundances are shown on a log scale according to the legend. The clinical and demographic features of the patients are shown at the top and are colored according to the legend. Note that in general, patients belonging to the UC2 and CD2 groups clustered together and away from patients in the UC1 and CD1 groups and the controls (Non-IBD). **(B)** Relative abundances (%) per patient of the four most abundant phyla. **(C)** Alpha diversity between IBD groups (UC1, UC2, CD1, and CD2) and control individuals determined by the observed OPU (Richness) and the Shannon index (Diversity). Significance: \*  $p < 0.05$ , \*\*  $p < 0.005$ , Kruskal-Wallis & Dunn's tests. **(D)** Radar chart showing association of IBD groups with clinical features. Pairwise association between patient groups and clinical features was performed in contingency tables by odds ratios. Significance: \*  $p < 0.05$ , Pearson's chi-squared test or Fisher's exact test. The figure was prepared using the Plotly package [47] in R [48].



## 1 **Dysbiosis in Crohn's patients is correlated with disease severity**

2 We then asked whether patient groups correlated with demographic and clinical  
3 variables. Regarding demographic features, no significant correlations were found with  
4 respect to age, sex, or origin of the patients (not shown). Similarly, there were no  
5 significant correlations of the UC1 and UC2 groups with clinical variables. By contrast,  
6 while the CD1 group correlated with colonic location (L2) and an inflammatory disease  
7 behavior (B1), the CD2 group correlated with ileal location (L1), the stricturing (B2) and  
8 penetrating (B3) phenotypes, and surgery (Fig. 2D). Thus, patients in the CD2 group  
9 were associated with an advanced stage of the disease, which suggests a clinically  
10 relevant link between gut microbiota dysbiosis and disease severity.

11

## 12 **Dysbiosis in IBD is characterized by an increase in pathobionts and a decrease in** 13 **anti-inflammatory commensal bacteria**

14 Although it is not known whether dysbiosis is a cause or a consequence of IBD, the  
15 identification of specific taxa and bacteria (biomarkers) associated with these patients  
16 may contribute to understanding the dynamics of this disease (progression or remission),  
17 as well as the development of diagnostic aids [49]. Therefore, we sought to characterize  
18 the variation in the gut microbiota at different taxonomic levels among the IBD patients  
19 and controls. We found that the relative abundances at the phylum and class levels were  
20 similar between the UC1, CD1 and control groups, further confirming that these IBD  
21 patients have a non-dysbiotic gut microbiota (eubiotic status) (Fig. 3). Conversely, in the  
22 UC2 and CD2 groups, the phylum Firmicutes was decreased, mainly attributed to a lower  
23 abundance in Clostridia, while the phylum Proteobacteria was increased, mainly  
24 attributed to a higher abundance in Alpha- and Gammaproteobacteria (Fig. 3A and 3B).

25

26 At the family level, we found that the UC2 and CD2 groups had a greater abundance of  
27 Enterobacteriaceae and Pseudomonadaceae. Additionally, Shewanellaceae was  
28 increased in UC2. The shift in the gut microbiota composition in the UC2 and CD2 groups  
29 was also characterized by a decreased abundance of Ruminococcaceae,  
30 Lachnospiraceae, Eubacteriaceae, Porphyromonadaceae and Bacteroidaceae (Fig.  
31 3C and 3D). On the other hand, differences between the UC2 and CD2 groups were only  
32 observed in Fusobacteriaceae and Veillonellaceae, with both taxa being decreased in  
33 the UC2 group. Hence, the dysbiotic profile of UC2 and CD2 patients was in general very  
34 similar.

35

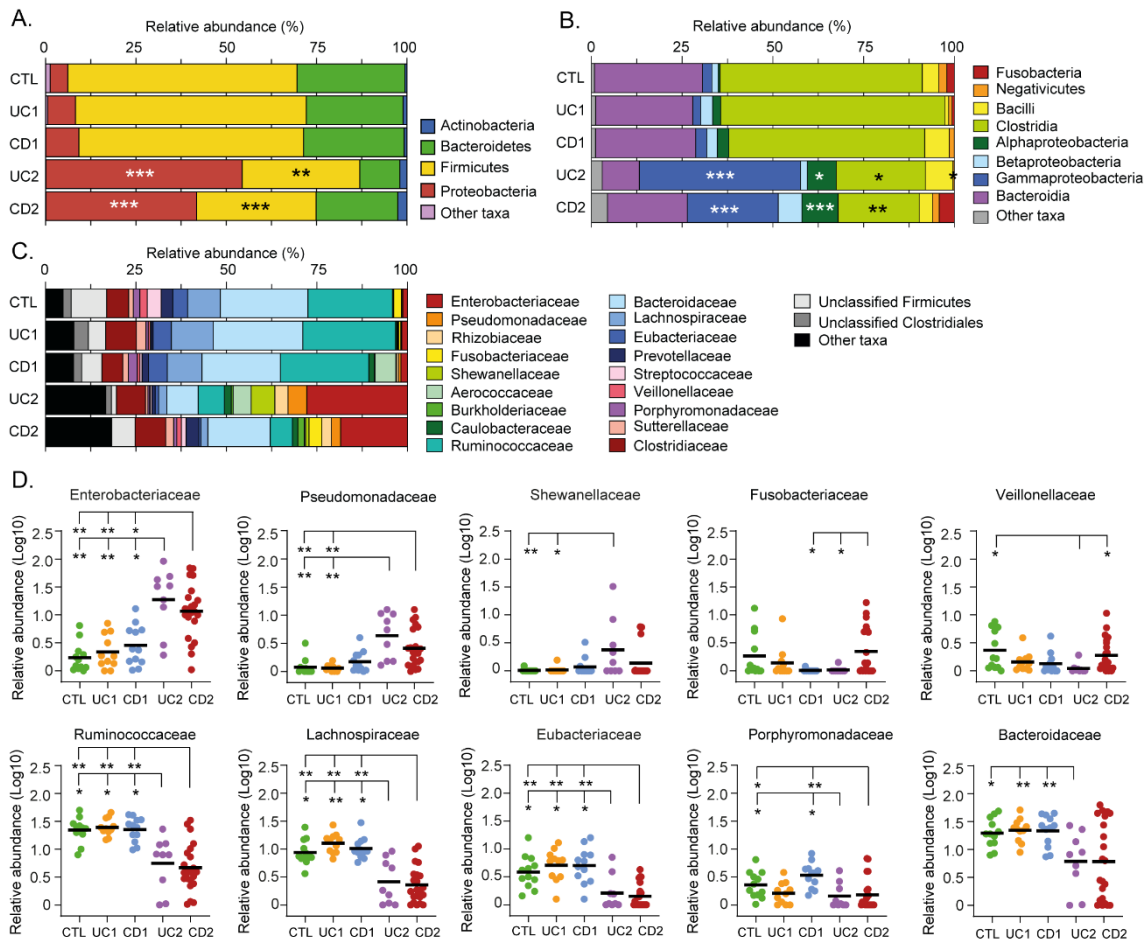

**FIGURE 3. Phylogenetic composition of bacterial taxa at the phylum, class, and family level among IBD patients and non-IBD controls.** Relative abundances (%) of common bacterial taxa (> 1% abundance) at phylum (A), class (B), and family (C) levels. (D) For a better analysis and visualization, comparisons in the relative abundances at the family level between groups were performed using Log-transformed values. Each data point corresponds to a sample and horizontal lines to the means. Only taxa in which significant differences were found are shown. Significance: \*  $p < 0.05$ , \*\*  $p < 0.005$ , \*\*\*  $p < 0.0005$ , Kruskal-Wallis & Dunn's tests.

To further investigate the microbial imbalance in the IBD, we used the LEfSe algorithm to identify which OPUs were differentially abundant in the dysbiotic patients (UC2 and CD2 groups) compared to the eubiotic patients (UC1 and CD1 groups) and controls. As a result, 24 OPUs were found to be significantly increased in dysbiotic patients, including several potential pathogens (pathobionts) such as *Escherichia coli*, *Klebsiella oxytoca*, *Ruminococcus gnavus*, *Enterococcus faecalis*, several *Rhizobium*, *Pseudomonas* and *Clostridium* species, and members of the tribe *Proteeae* (*Providencia*/*Morganella*) (Fig. 4A, Table S3). By contrast, 25 OPUs were found to be decreased, including several symbionts known to provide important functions for gut health, mainly through the production of butyrate [50, 51]. For instance, butyrate producers such as *Faecalibacterium prausnitzii*, *Blautia*, *Gemmiger formicilis*, *Eubacterium rectale*,

1 *Ruminococcus torques*, *Roseburia inulinivorans* and *Coprococcus catus* were  
 2 significantly decreased. Other commensal bacteria such as *Alistipes* and *Dorea* were  
 3 also decreased in these patients. Thus, collectively these results indicate that the  
 4 dysbiosis in these IBD patients is characterized by an increase in pathobionts and a  
 5 decrease in beneficial commensal bacteria.  
 6  
 7

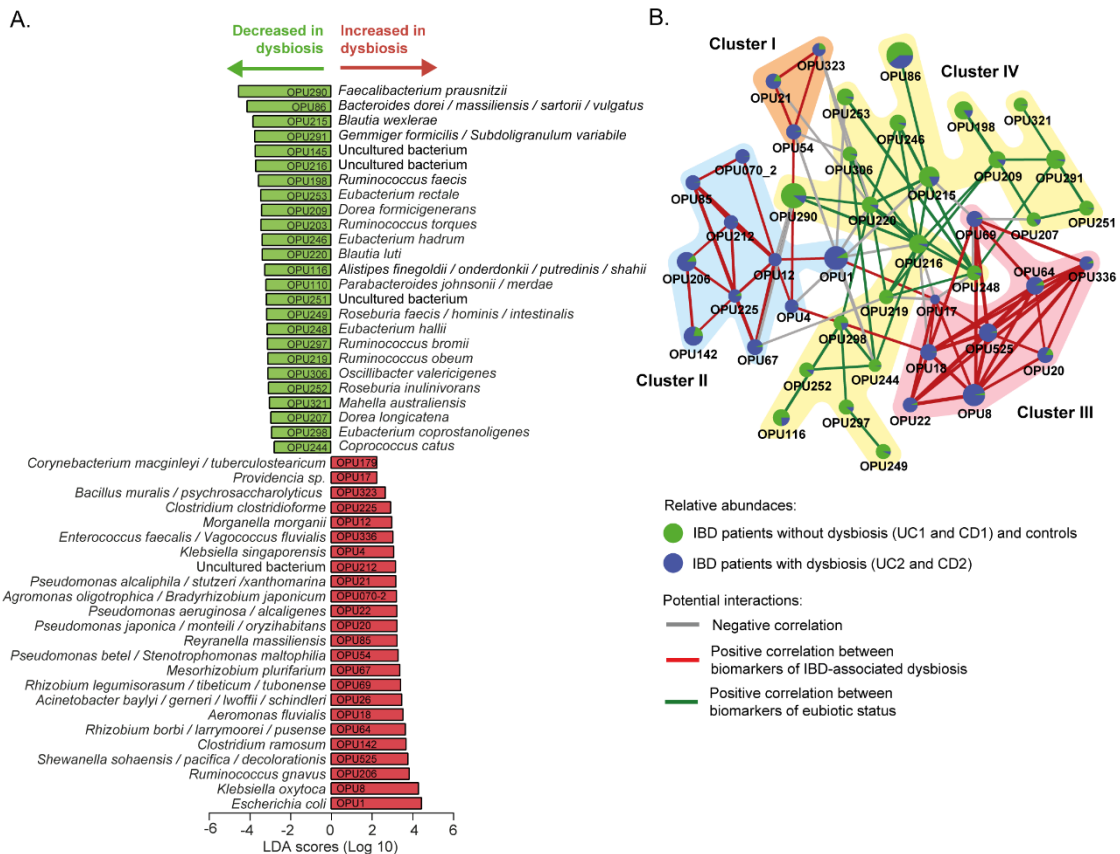

8  
 9  
 10  
 11  
 12  
 13  
 14  
 15  
 16  
 17  
 18  
 19  
 20  
 21  
 22  
 23  
 24

**FIGURE 4. Differently abundant OPUs in dysbiotic IBD patients and their co-existence networks. (A)** The LefSe algorithm with a linear discriminant analysis (LDA) score >2 enabled the identification of OPUs that differed significantly in abundance between the dysbiotic patients (UC2 and CD2 groups) and eubiotic patients (UC1 and CD1) and non-IBD controls **(B)** Correlation networks of differently abundant OPUs. This analysis was performed using SparCC [52] (see methods). The nodes (pie charts) represent OPUs, with size reflecting the relative abundance in IBD patients and controls, as described in the legend. The links between nodes correspond to significant interactions (positive or negative correlations), with line width reflecting the strength of the correlation. Clusters (I to IV) of highly correlated OPUs are indicated. Unconnected nodes were omitted.

1 **Pathobionts increased in dysbiotic IBD patients have co-occurring relationships**  
2 **and do not co-exist with the core bacteria of the eubiotic state**

3 In the context of IBD, unraveling potential interactions between bacteria associated with  
4 a healthy or an affected mucosa can contribute to understanding how the microbiota  
5 responds and adapts to an inflammatory environment. The correlation network analysis  
6 has been used to predictively model the interplay between the microbiota and the  
7 environment [53]. Consequently, in the following we explore the potential interactions  
8 among the OPUs that were differentially abundant in IBD patients using the SparCC  
9 algorithm [52].

10

11 Notably, this analysis revealed that pathobionts increased in dysbiosis form three  
12 clusters (I, II and III) of positive co-occurring relationships (Fig 4B). In particular, Cluster  
13 I (OPU21, OPU54 and OPU323) and Cluster III (OPU8, OPU17, OPU18, OPU20,  
14 OPU22, OPU64, OPU69, OPU336 and OPU525) include facultative anaerobic and  
15 aerobic bacteria, and Cluster II (OPU1, OPU4, OPU12, OPU67, OPU70-2, OPU85,  
16 OPU142, OPU206, OPU212 and OPU225) includes obligate anaerobic, facultative  
17 anaerobic and aerobic bacteria (Table S3). Furthermore, these three clusters have  
18 negative correlations (mutual exclusivity) with Cluster IV, which is formed by obligate  
19 anaerobic bacteria that were significantly abundant in patients without dysbiosis and the  
20 controls. Overall, this result indicates that bacteria of Clusters I and III and the majority  
21 of Cluster II can survive in a niche with a high level of oxygen. Therefore, oxygen levels  
22 at the intestinal mucosa could be an environmental characteristic that determine the type  
23 of relationship (co-existence or mutual exclusivity) between these bacteria.

24

25 **Dysbiosis in IBD patients is characterized by a shift from obligate to facultative**  
26 **anaerobes and to aerobic bacteria**

27 The healthy intestinal mucosa has low levels of oxygen and thereby allows the survival  
28 and establishment of bacterial communities of obligate anaerobes. By contrast, dysbiosis  
29 in IBD is characterized by an increase in facultative anaerobes from the phylum  
30 Proteobacteria. Furthermore, it has been hypothesized (Oxygen Hypothesis) that chronic  
31 inflammation leads to an increased oxygen levels in the gut, which in turn creates a  
32 microenvironment that favors facultative anaerobes or even aerobic bacteria [28]. In light  
33 of these observations, we evaluated the oxygen hypothesis by investigating the microbial  
34 respiration of mucosa-associated intestinal microbiota among the IBD patients.  
35 Interestingly, consistent with the oxygen hypothesis and previous studies [54, 55], we  
36 found that the IBD patients with dysbiosis (UC2 and CD2) have a decreased abundance  
37 of obligate anaerobes and an increased abundance of facultative anaerobes and aerobic

1 bacteria. Thus, this result, together with the correlation network analysis, strongly  
2 suggests a key role for oxygen in the intestinal dysbiosis of IBD patients.

3

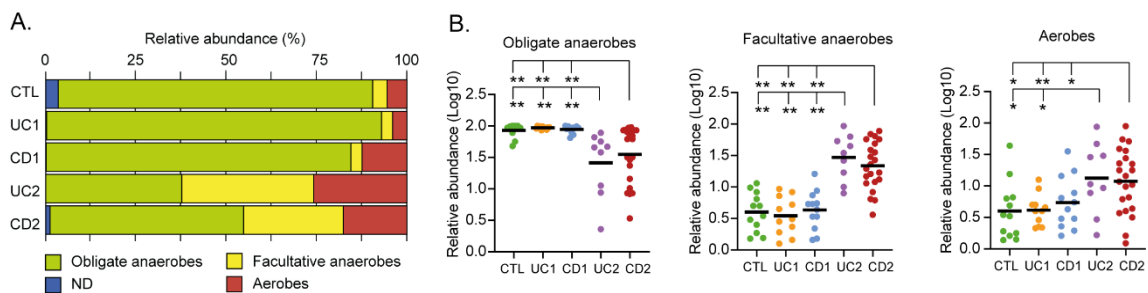

4

5

6 **FIGURE 5. Microbial respiration of mucosa-associated intestinal microbiota**  
7 **among the IBD patients. (A)** Relative abundances (%) of OPUs classified as obligate  
8 anaerobes, facultative anaerobes, or aerobes. **(B)** Differences in the relative  
9 abundances (Log10) of obligate anaerobes, facultative anaerobes, or aerobes. Each  
10 data point corresponds to a sample and horizontal lines to the means. Significance: \*  $p$   
11  $< 0.05$ , \*\*  $p < 0.005$ , Kruskal-Wallis & Dunn's tests. ND: Unclassified bacteria with  
12 unknown respiration type.

13

14

### 15 **Bacterial biomarkers make it possible to discriminate dysbiosis and eubiosis in** 16 **IBD patients and between UC and CD patients with dysbiosis**

17 Currently, IBD has no clear etiology, and due to non-specific symptoms, diagnosis in  
18 some patients can be delayed or missed [56]. In this sense, diagnostics is a promising  
19 application of the microbiota association studies. It is important to note that instead of  
20 classifying IBD patients based on the overall gut microbiota composition, the use of a  
21 small set of bacterial biomarkers would be more feasible and economical in clinical  
22 practice. Moreover, since dysbiosis is not a common feature among IBD patients, we  
23 rationalize that as a first approach, discriminating dysbiosis from eubiosis in these  
24 patients could be a valuable diagnostic aid.

25

26 Therefore, we evaluated the 49 differentially abundant OPUs as biomarkers using the  
27 ROC curve analysis. This analysis showed that some of these OPUs could discriminate  
28 dysbiosis from eubiosis but with a fair to poor diagnostic performance (Figure S1). The  
29 best performance as biomarkers were achieved by *Faecalibacterium prausnitzii*  
30 (OPU290), *Blautia luti* (OPU220), *Coprococcus catus* (OPU244), *Eubacterium hadrum*  
31 (OPU246) and *Escherichia coli* (OPU1), with an area under the curve (AUC) ranging  
32 from 0.87 to 0.94.

33

1 Next, to improve the diagnostic performance achieved by individual biomarkers, we used  
2 a combinatorial panel of OPUs and implemented five machine learning classification  
3 methods (Neural Network, Naïve Bayes, Logistic regression, Random Forest, and  
4 Support Vector Machines) (see methods). For this, we selected ten biomarkers of  
5 eubiosis and ten biomarkers of dysbiosis based on their AUC. As a result, we found that  
6 this panel of twenty biomarkers enabled dysbiosis to be distinguished from eubiosis with  
7 a high discriminatory power, with an AUC ranging from 0.96 to 0.99 (Fig. 6, Table 1). In  
8 particular, the Neural Network and Naïve Bayes models were the best performing  
9 classifiers, both with an overall accuracy of 96% (Table 1).

10

11 Finally, because the microbiota composition between the UC and CD patients with  
12 dysbiosis was remarkably similar, we sought to clarify whether bacterial biomarkers can  
13 discriminate between these groups of patients. For this, we implemented the same  
14 prediction pipeline shown above, that is, the LEfSe algorithm followed by a ROC curve  
15 analysis and machine learning classification methods. In this case, we selected a panel  
16 of four biomarkers of UC patients with dysbiosis and seven biomarkers for CD patients  
17 with dysbiosis (Fig. 6C). By using these eleven biomarkers, the Naïve Bayes model was  
18 the best classifier, achieving an AUC and accuracy of 0.83 and 77%, respectively (Fig.  
19 6D, Table 1). Collectively, these results highlight the potential use of these bacterial  
20 markers as a diagnostic aid in IBD.

21

22

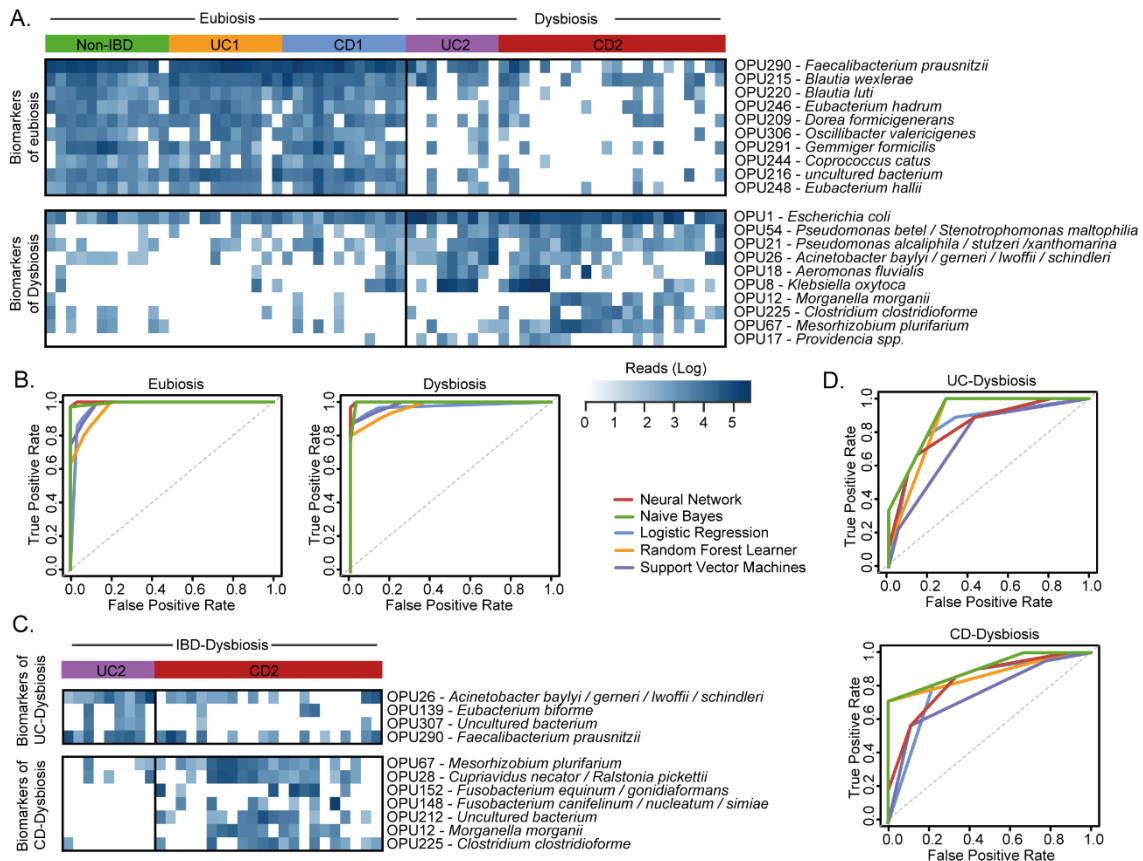

**FIGURE 6. Evaluation of OPUs as biomarkers for IBD. (A)** Heatmap showing the number of reads (log scale) of the best 20 indicator OPUs for dysbiosis and eubiosis in IBD. Rows represent OPUs and columns the patients ordered by groups. **(B)** Evaluation of five machine learning models and the above panel of twenty indicator OPUs to discriminate dysbiosis from eubiosis in the IBD patients. **(C)** Heatmap showing the number of reads (log scale) of the best 11 indicator OPUs for the UC (UC2) and CD (CD2) patients with dysbiosis. Rows represent OPUs and columns the patients ordered by groups. **(D)** Evaluation of five machine learning models and the above panel of 11 indicator OPUs to discriminate UC2 patients from CD2 patients. The diagnostic performance of each classifier model is represented by ROC curves and the area under the curve is indicated in Table 1.

**TABLE 1. Cross-validation of bacterial biomarkers and machine learning methods for diagnostic aids in IBD**

| Method                                             | Average AUC | CA   | IBD-Dysbiotic profile |           |        | Eubiotic profile     |           |        |
|----------------------------------------------------|-------------|------|-----------------------|-----------|--------|----------------------|-----------|--------|
|                                                    |             |      | F1                    | Precision | Recall | F1                   | Precision | Recall |
| TOP 20 indicator OPUs (IBD Dysbiosis vs. Eubiosis) |             |      |                       |           |        |                      |           |        |
| SVM                                                | 0.97        | 0.92 | 0.92                  | 0.96      | 0.87   | 0.93                 | 0.89      | 0.97   |
| Random Forest                                      | 0.96        | 0.88 | 0.87                  | 0.89      | 0.84   | 0.89                 | 0.87      | 0.91   |
| Neural Network                                     | 0.99        | 0.96 | 0.95                  | 1.00      | 0.903  | 0.96                 | 0.92      | 1.00   |
| Naïve Bayes                                        | 0.99        | 0.96 | 0.95                  | 0.97      | 0.94   | 0.96                 | 0.94      | 0.97   |
| Logistic Regression                                | 0.97        | 0.89 | 0.89                  | 0.90      | 0.87   | 0.90                 | 0.89      | 0.91   |
| Method                                             | Average AUC | CA   | UC-Dysbiotic profile  |           |        | CD-Dysbiotic profile |           |        |
|                                                    |             |      | F1                    | Precision | Recall | F1                   | Precision | Recall |
| Top 11 indicator OPUs (UC2 – CD2 groups)           |             |      |                       |           |        |                      |           |        |
| SVM                                                | 0.68        | 0.74 | 0.429                 | 0.60      | 0.33   | 0.83                 | 0.77      | 0.91   |
| Random Forest                                      | 0.82        | 0.68 | 0.38                  | 0.43      | 0.33   | 0.78                 | 0.75      | 0.82   |
| Neural Network                                     | 0.75        | 0.74 | 0.56                  | 0.56      | 0.56   | 0.82                 | 0.82      | 0.82   |
| Naïve Bayes                                        | 0.83        | 0.77 | 0.72                  | 0.56      | 1.00   | 0.81                 | 1.00      | 0.68   |
| Logistic Regression                                | 0.80        | 0.71 | 0.53                  | 0.50      | 0.56   | 0.79                 | 0.81      | 0.77   |

SVM, Support Vector Machine. AUC, Area under the curve. CA, Classification accuracy measures the ratio of the correct predictions to the total number of instances evaluated. F1-measure denotes the harmonic mean between recall and precision values, where an F1 score reaches its best value at 1 and the worst score at 0.



## 1 **DISCUSSION**

2 Several studies have investigated the gut microbiota composition in patients with IBD,  
3 but most have mainly analyzed stool samples [42–44]. Fecal samples are readily  
4 available and easily collected, allowing easy longitudinal sampling within individuals with  
5 no major methodological complexities. However, fecal microbial communities do not  
6 accurately represent the mucosa-associated microbiota that live in the gastrointestinal  
7 tract (e.g. colon, ileum and small intestine) [32–34]. Moreover, characterization of the  
8 microbiota at mucosal lesion sites provides relevant insights and more accurate  
9 conclusions regarding taxonomic composition and dysbiosis in gastrointestinal disorders  
10 such as IBD [23, 57]. For instance, Gevers et al. [36] investigated the composition of the  
11 microbiota in IBD patients using different sample types (stool samples and tissue  
12 biopsies of the ileum and rectum) and found that the rectal mucosa-associated  
13 microbiota has the potential for an early and accurate diagnosis of CD. By contrast, the  
14 composition of the fecal microbiota was less informative with a poor diagnostic  
15 performance in IBD.

16  
17 In this work, we determined the landscapes and bacterial signatures of mucosa-  
18 associated microbiota in two independent cohorts of Chilean and Spanish patients  
19 diagnosed with IBD. For this, we used the Operational Phylogenetic Unit (OPU) concept  
20 for taxonomic assignment [37], which allowed us to reach the species level with a lower  
21 number of reads than needed for the traditional OTU-based approach (Fig. 1A). Our  
22 results showed that while some IBD patients had an imbalance in the mucosa-associated  
23 microbiota, other patients had a microbial composition that was similar to that of non-IBD  
24 controls (Fig. 1B-E). Hence, dysbiosis was not a common feature among the IBD  
25 patients, and thus, we decided to subdivide them (based on the microbiota composition  
26 and the IBD phenotype) into four groups: two eubiotic groups (UC1 and CD1) and two  
27 dysbiotic groups (UC2 and CD2). Importantly, this subclassification was consistent with  
28 the hierarchical clustering of patients in which the UC1, CD1 and non-IBD controls  
29 clustered together but away from UC2 and CD2 (Fig. 2A). Our results showed that the  
30 dysbiosis in UC2 and CD2 was characterized by an increase in Proteobacteria and a  
31 decrease in Firmicutes (Fig. 2B and Fig. 3). Previous studies have also shown the same  
32 alteration in the abundance of these phyla in the mucosa-associated microbiota of IBD  
33 patients [30, 58, 59]. Moreover, differences between the UC2 and CD2 groups were only  
34 observed at the family level, with a decreased abundance of Fusobacteriaceae and  
35 Veillonellaceae in the UC2 group (Fig. 3D). Despite the similarities in the microbial  
36 composition of UC2 and CD2 groups, dysbiosis was correlated with disease severity only  
37 in the latter group (Fig. 2D).

1 Several bacteria (pathobionts) that were found to be increased in the mucosal samples  
2 of dysbiotic IBD patients are known to have the potential to exacerbate inflammation  
3 (Fig. 4A and Table S3). For instance, pathogenic *E. coli* strains with the ability to adhere  
4 and invade the intestinal mucosa have been isolated with a high frequency from biopsies  
5 of CD patients [26, 27]. *Klebsiella oxytoca* causes antibiotic-associated hemorrhagic  
6 colitis [60, 61]. *Ruminococcus gnavus* produces an inflammatory polysaccharide and an  
7 increased abundance of this bacterium in IBD patients has been linked to an increase in  
8 disease activity [62–64]. *Enterococcus faecalis* metalloprotease GelE disrupts the  
9 epithelial barrier and increased intestinal inflammation in interleukin-10 knockout mice  
10 [65–67]. An increased abundance of *Rhizobium* spp has been shown in CD patients with  
11 recurrence after surgery compared to those who remain in remission [46]. Similarly, an  
12 increased abundance of *Pseudomonas* spp has been reported in IBD patients [44, 68].  
13 Moreover, *Pseudomonas* spp. can attach to intestinal epithelial cells and deliver toxins  
14 to host cells through a type 3 secretion system, thereby causing epithelial cell damage  
15 [69, 70]. *Clostridium ramosum* has been reported to be increased in pediatric patients  
16 with CD and induces ulcerative colitis in the DSS-colitis mouse model [71, 72].

17  
18 The dysbiosis in the IBD patients was also characterized by a decreased abundance of  
19 several commensal bacteria with anti-inflammatory properties, including several butyrate  
20 producers such as *Faecalibacterium prausnitzii*, *Blautia*, *Gemmiger formicilis*,  
21 *Eubacterium rectale*, *Ruminococcus torques*, *Roseburia inulinivorans* and *Coprococcus*  
22 *catus* [73]. This result is in agreement with previous studies showing a reduced  
23 abundance of multiple butyrate-producing bacteria in dysbiotic IBD patients [41, 45, 74].  
24 Butyrate is a short-chain fatty acid that plays an important role in maintaining the integrity  
25 of colonic mucosa and regulating cell proliferation and differentiation [50, 51]. Studies on  
26 biopsies from patients with CD cultured with butyrate showed a dose-dependent  
27 decrease in the expression of proinflammatory cytokines [75]. In particular,  
28 *Faecalibacterium prausnitzii* is known to be a core bacterium of the gut microbiota of  
29 healthy adults, representing around 5% of the total bacterial population. This bacterium  
30 plays an important role in butyrate production and has a strong anti-inflammatory effect  
31 [73]. Many studies have shown a decreased abundance of this bacterium in IBD patients,  
32 this reduction being a bacterial signature of dysbiosis as well as the severity and activity  
33 of the disease [24, 76, 77]. Additional studies are needed to investigate whether the  
34 increased abundance of the pathobiont and the depletion of butyrate-producing bacteria  
35 may trigger pro-inflammatory signals that contribute to the development or progression  
36 of the IBD.

1 An interesting finding of this study was the identification of potential co-occurring  
2 relationships between pathobionts associated with the inflamed mucosa (Fig. 4B). In  
3 turn, these pathobionts showed mutually exclusive relationships with the core bacteria  
4 of the healthy mucosa. In an ecological context, a cluster network of highly correlated  
5 organisms could be supported by synergistic, related, or shared biological function,  
6 including metabolism, respiration, trophic chains, specific bacterial features (immune  
7 evasion, aggregation / biofilm formation) and habitat characteristics (pH, salinity, immune  
8 recognition, mucins, among others). In line with this idea, we found that that most of the  
9 OPUs that form Clusters I, II and III are facultative anaerobic or aerobic bacteria.  
10 Conversely, the OPUs of Cluster IV are obligate anaerobic bacteria (Table S3). Thus,  
11 pathobionts belonging to Clusters I, II and III could be favored by the inflammation and  
12 thickness reduction of the mucus layer, which leads to a higher oxygen level in the  
13 intestinal epithelium. Moreover, this result is consistent with the study by Hughes et al.,  
14 2017 [54], in which formate oxidation and oxygen respiration were identified as metabolic  
15 signatures for inflammation-associated dysbiosis.

16

17 Importantly, we observed an increased abundance of facultative anaerobes and aerobic  
18 bacteria in dysbiotic IBD patients (Fig. 5), which is consistent with the oxygen hypothesis.  
19 This hypothesis states that chronic inflammation in IBD patients leads to a greater  
20 release of hemoglobin (which carries oxygen) and reactive oxygen species to the  
21 intestinal lumen. Thus, the increase in oxygen levels causes a disruption in anaerobiosis  
22 that confers selective advantages to facultative anaerobes and aerobes, allowing them  
23 to become more competitive and able to overgrow [28].

24

25 Cost-effective, rapid, and reproducible biomarkers would be helpful for patients and  
26 clinicians in the diagnosis of IBD. Several bacterial biomarkers for IBD diagnosis have  
27 been evaluated in previous studies with promising results [42, 56, 78–80]. The panel of  
28 bacterial biomarkers identified in the current study made it possible to discriminate  
29 dysbiosis from eubiosis in IBD with a high discriminatory power (96% accurately) (Fig.  
30 6A). Likewise, our bacterial biomarkers discriminated between the dysbiotic UC patient  
31 from the dysbiotic CD patients, although with a lower diagnostic performance (77%  
32 accurately) (Fig. 6B). The cross-validation of these bacterial biomarkers in different  
33 cohorts will confirm their potential use as a diagnostic aid. Finally, these biomarkers  
34 could be combined with imaging techniques and calprotectin levels to improve the  
35 diagnosis of IBD, thereby facilitating clinical decision-making.

36

37

## 1 MATERIALS AND METHODS

2

### 3 Patients

4 Two independent cohorts of patients with IBD from Chile and Spain were included in this  
5 study (Table S1). Both cohorts were adults and included 20 Chilean patients diagnosed  
6 with ulcerative colitis (UC\_CH), 21 Chilean patients diagnosed with Crohn's disease  
7 (CD\_CH) and 5 Chilean non-IBD control individuals (CTL\_CH) who underwent a  
8 colonoscopy due to a family history of colon cancer. The Spanish cohort was previously  
9 reported by Vidal et al., 2015 [37], of which we included 13 patients with CD and 7 non-  
10 IBD control individuals. Patients who received antibiotic treatment within one month prior  
11 to the colonoscopy were excluded.

12

### 13 Ethics approval

14 The study was approved by the Institutional Review Board of Clínica Las Condes,  
15 Faculty of Medicine, Universidad de Chile; Ethics Committee of the Northern  
16 Metropolitan Health Service, Santiago, Chile; and the Balearic Islands' Ethics  
17 Committee, Spain. Study participants provided written informed consent before entering  
18 the study. All records and information were kept confidential and all identifiers were  
19 removed prior to analysis.

20

### 21 Nucleic acid extraction, 16S rDNA amplification and pyrosequencing

22 Total DNA was extracted from biopsy samples using the E.Z.N.A. DNA/RNA Isolation kit  
23 (Omega-Bio-Tek) following the manufacturer's recommendations. The rRNA 16S gene  
24 was amplified from the extract using the universal primers GM3 (5'-  
25 AGAGTTTGATCMTGGC-3') and 907r (5'-CCGTCAATTCMTTGGAGTTT-3'). A nested  
26 PCR with the amplified product was performed using 454 primers. The primer sequences  
27 for the nested PCR are listed in Table S4. This purified product was sequenced using  
28 the 454 GS-FLX+ platform (Macrogen, Seoul, South Korea). The datasets of Spanish  
29 subjects generated during the current study are available in the ENA sequence  
30 repository under the project accession numbers PRJEB6107 and ERP005574.

31

### 32 Sequence trimming, chimera verification and OTU grouping

33 Data were processed using a Mothur pipeline [81]. We eliminated low-quality sequences,  
34 defined as: sequences under 300 bp, those with a window size and average quality score  
35 of 25, a maximum homopolymer of 8 nucleotides, without ambiguities and reading  
36 mismatches with barcodes primers. Chimeras were eliminated using Chimera Uchime  
37 implemented in Mothur. Sequences were grouped into OTUs with 99% [37] identity using

1 the UCLUST package in QIIME [82]. The most abundant reading of each OTU was  
2 chosen as its representative.

3

#### 4 **Phylogenetic affiliation and OPU determination.**

5 Representative OTUs, grouped into OPUs in a previous study [37] on samples from  
6 Spanish patients, were added to the LTP111 database. These samples were aligned  
7 using SINA [83, 84] and incorporated into ARB [38] using the maximum parsimony  
8 model. The sequences were grouped into OPUs based on a manual inspection of their  
9 genealogy.

10

#### 11 **Compositional, comparative, and statistical analysis**

12 For the statistical analysis and visual exploration, the microbiome data were uploaded to  
13 the MicrobiomeAnalyst server [85]. An alpha diversity analysis was calculated based on  
14 observed OPUs (Richness) and Shannon Index (Diversity). Beta diversity was calculated  
15 based on the principal coordinate analysis (PCoA) using the Bray-Curtis dissimilarity. A  
16 hierarchical cluster analysis based on the relative abundances of 608 OPUs was  
17 performed using the Bray-Curtis dissimilarity metric and Ward's linkage. Heat maps  
18 showing OPU abundances were drawn using the gplots package [86] in R [48].

19

20 Statistical differences in the abundance of specific taxa between groups were determined  
21 using the Kruskal-Wallis test followed by Dunn's multiple comparisons test. The variation  
22 in the read counts and relative abundances across patients can hamper and bias the  
23 identification of disease-associated taxa [40] Indeed, as the taxonomic level decreases,  
24 there are fewer taxonomic units and therefore, the subject-to-subject variation can lead  
25 to the loss of statistical power. To overcome this problem, logarithmic transformation has  
26 been implemented in several microbiome studies, allowing better association analyses  
27 compared to the linear scale [40, 87]. Consequently, analysis at family level and below  
28 were made on data that was transformed using the  $\log(X+1)$  method.

29

30 To determine differentially abundant taxa in different groups, a linear discriminant  
31 analysis effect size (LEfSe) [88] was performed in the MicrobiomeAnalyst server [85].  
32 For this, a p-value cut off at 0.05 and linear discriminant analysis (LDA) score threshold  
33 2.0 were used. The LEfSe is an algorithm that detects species and functional  
34 characteristics that are differentially abundant between two or more environments with  
35 statistical significance, effect relevance, and biological consistency. The LEfSe uses the  
36 LDA to estimate the effect size of each differentially abundant feature. To explore the

1 potential interactions among OPUs, a correlation network analysis was performed by  
2 using the SparCC algorithm [52].

#### 3 4 **Bacterial biomarkers and classifier validation**

5 We defined as biomarkers those OPUs identified by the LEfSe algot which were present  
6 in more than half of the samples of the corresponding group (i.e., dysbiosis vs. eubiosis  
7 and dysbiotic UC patients vs. dysbiotic CD patients). In order to evaluate the  
8 performance of each indicator OPU in discriminating between groups, we first performed  
9 a receiver operating characteristic (ROC) curve analysis in the easyROC server [89].  
10 Next, we selected the best discriminating OPUs and implemented several classification  
11 algorithms, including Naive Bayes (NB), Random Forest (RF), Logistic Regression (LR)  
12 and Support Vector Machine (SVM) and Neural Network (NN) using the Orange data  
13 mining suite, V.3.27.0 (<http://orange.biolab.si>) [90]. NB is a generative model, RF is an  
14 ensemble method using decision trees, whereas SVM, LR and NN are discriminative  
15 models. We used 70% of samples as the training set, and the rest were used as the test  
16 set with the five-fold cross-validation method. The results of the cross-validation  
17 (classification accuracy, sensitivity, and specificity) were registered and depicted by  
18 ROC curves.

1

2 **ACKNOWLEDGMENTS**

3 We thank the National Laboratory for High Performance Computing, NLHPC (ECM-02),  
4 for sharing their server facilities, and Mauricio Cerda from the Center of Medical  
5 Informatics and Telemedicine (CIMT) at the University of Chile for his technical  
6 assistance. We thank Dr. Helen Lowry for her careful review of the manuscript and  
7 helpful discussions.

8 This study was supported by Fondo Nacional De Desarrollo Científico y Tecnológico  
9 FONDECYT grant 1161161 to R. Vidal, CONICYT-PCHA/2014-21140975 fellowship to  
10 N. Chamorro, FONDECYT 1120577 and 1170648 to Hermoso MA and the Spanish  
11 Ministry of Economy projects CLG2015 66686-C3-1-P to Rosselló-Mora R., as well as  
12 funds from the the European Regional Development Fund (FEDER) and NSF  
13 Dimensions in Biodiversity grant OCE-1342694. Support was also provided by a  
14 Millennium Science Initiative grant from the Ministry of Economy, Development and  
15 Tourism to Paredes-Sabja D.

16

17

18 **CONFLICT OF INTEREST**

19 Funding institutions did not influence the study design or interpretation of the result.  
20 Moreover, the authors declare that they have no competing interests.

21

22

1 **SUPPLEMENTARY MATERIAL**

2

3 **Supplementary Figure 1.** Evaluation of OPUs as diagnostic biomarkers in IBD.

4

5 **Supplementary Table 1.** Clinical and demographic features of the IBD patients and  
6 control individuals enrolled in this study

7

8 **Supplementary Table 2.** Read distribution, OTU and OPU reading analysis,  
9 characterized by patient group and country

10

11 **Supplementary Table 3.** Bacterial clades that differed between IBD patients with  
12 dysbiosis and without dysbiosis

13

14 **Supplementary Table 4.** Primer sequences used by nested PCR

15

16

17

18

19

20

21

22

23

24

25

26

27

28

29

30

31



## 1 REFERENCES

- 2
- 3 1. Hooper L V., Littman DR, and Macpherson AJ (2012). Interactions between the  
4 microbiota and the immune system. **Science (80- )**. 336(6086): 1268–1273. doi:  
5 10.1126/science.1223490.
- 6 2. Wang Y, Kuang Z, Yu X, Ruhn KA, Kubo M, and Hooper L V (2017). The intestinal  
7 microbiota regulates body composition through NFIL3 and the circadian clock. **Science**  
8 **(80- )**. 357(6354): 912–916. doi: 10.1126/science.aan0677.
- 9 3. David LA, Maurice CF, Carmody RN, Gootenberg DB, Button JE, Wolfe BE, Ling A  
10 V., Devlin AS, Varma Y, Fischbach MA, Biddinger SB, Dutton RJ, and Turnbaugh PJ  
11 (2014). Diet rapidly and reproducibly alters the human gut microbiome. **Nature**.  
12 505(7484): 559–563. doi: 10.1038/nature12820.
- 13 4. Gao X, Cao Q, Cheng Y, Zhao D, Wang Z, Yang H, Wu Q, You L, Wang Y, Lin Y, Li  
14 X, Wang Y, Bian J, Sun D, Kong L, Birnbaumer L, and Yang Y (2018). Chronic stress  
15 promotes colitis by disturbing the gut microbiota and triggering immune system  
16 response. **Proc Natl Acad Sci**. 115(13): E2960–E2969. doi:  
17 10.1073/pnas.1720696115.
- 18 5. Aguilera M, Cerdà-Cuellar M, and Martínez V (2015). Antibiotic-induced dysbiosis  
19 alters host-bacterial interactions and leads to colonic sensory and motor changes in  
20 mice. **Gut Microbes**. 6(1): 10–23. doi: 10.4161/19490976.2014.990790.
- 21 6. Allin KH, Nielsen T, and Pedersen O (2015). Mechanisms in endocrinology: Gut  
22 microbiota in patients with type 2 diabetes mellitus. **Eur J Endocrinol**. 172(4): R167–  
23 R177. doi: 10.1530/EJE-14-0874.
- 24 7. Schulz MD, Atay Ç, Heringer J, Romrig FK, Schwitalla S, Aydin B, Ziegler PK, Varga  
25 J, Reindl W, Pommerenke C, Salinas-Riester G, Böck A, Alpert C, Blaut M, Polson SC,  
26 Brandl L, Kirchner T, Greten FR, Polson SW, and Arkan MC (2014). High-fat-diet-  
27 mediated dysbiosis promotes intestinal carcinogenesis independently of obesity.  
28 **Nature**. 514(7253): 508–512. doi: 10.1038/nature13398.
- 29 8. Serino M, Blasco-Baque V, Nicolas S, and Burcelin R (2014). Far from the Eyes,  
30 Close to the Heart: Dysbiosis of Gut Microbiota and Cardiovascular Consequences.  
31 **Curr Cardiol Rep**. 16(11): 1–7. doi: 10.1007/s11886-014-0540-1.
- 32 9. Vázquez-Castellanos JF, Serrano-Villar S, Latorre A, Artacho A, Ferrús ML, Madrid  
33 N, Vallejo A, Sainz T, Martínez-Botas J, Ferrando-Martínez S, Vera M, Dronda F, Leal  
34 M, Del Romero J, Moreno S, Estrada V, Gosalbes MJ, and Moya A (2015). Altered  
35 metabolism of gut microbiota contributes to chronic immune activation in HIV-infected  
36 individuals. **Mucosal Immunol**. 8(4): 760–772. doi: 10.1038/mi.2014.107.
- 37 10. Tomova A, Husarova V, Lakatosova S, Bakos J, Vlkova B, Babinska K, and

- 1 Ostatnikova D (2015). Gastrointestinal microbiota in children with autism in Slovakia.
- 2 **Physiol Behav.** 138: 179–187. doi: 10.1016/j.physbeh.2014.10.033.
- 3 11. Yang Y, and Jobin C (2014). Microbial imbalance and intestinal pathologies:
- 4 Connections and contributions. **DMM Dis Model Mech.** 7(10): 1131–1142. doi:
- 5 10.1242/dmm.016428.
- 6 12. Li J, Butcher J, Mack D, and Stintzi A (2015). Functional impacts of the intestinal
- 7 microbiome in the pathogenesis of inflammatory bowel disease. **Inflamm Bowel Dis.**
- 8 21(1): 139–153. doi: 10.1097/MIB.0000000000000215.
- 9 13. Ng SC, Shi HY, Hamidi N, Underwood FE, Tang W, Benchimol EI, Panaccione R,
- 10 Ghosh S, Wu JCY, Chan FKL, Sung JJY, and Kaplan GG (2017). Worldwide incidence
- 11 and prevalence of inflammatory bowel disease in the 21st century: a systematic review
- 12 of population-based studies. **Lancet.** 390(10114): 2769–2778. doi: 10.1016/S0140-
- 13 6736(17)32448-0.
- 14 14. Simian D, Fluxá D, Flores L, Lubascher J, Ibáñez P, Figueroa C, Kronberg U,
- 15 Acuña R, Moreno M, and Quera R (2016). Inflammatory bowel disease: A descriptive
- 16 study of 716 local Chilean patients. **World J Gastroenterol.** 22(22): 5267–5275. doi:
- 17 10.3748/wjg.v22.i22.5267.
- 18 15. Bellolio Roth F, Gómez J, and Cerda J (2017). Increase in Hospital Discharges for
- 19 Inflammatory Bowel Diseases in Chile Between 2001 and 2012. **Dig Dis Sci.** 62(9):
- 20 2311–2317. doi: 10.1007/s10620-017-4660-5.
- 21 16. Cummings JRF, Cooney RM, Clarke G, Beckly J, Geremia A, Pathan S, Hancock
- 22 L, Guo C, Cardon LR, and Jewell DP (2010). The genetics of NOD-like receptors in
- 23 Crohn’s disease. **Tissue Antigens.** 76(1): 48–56. doi: 10.1111/j.1399-
- 24 0039.2010.01470.x.
- 25 17. Lavoie S, Conway KL, Lassen KG, Jijon HB, Pan H, Chun E, Michaud M, Lang JK,
- 26 Gallini Comeau CA, Dreyfuss JM, Glickman JN, Vlamakis H, Ananthakrishnan A,
- 27 Kostic A, Garrett WS, and Xavier RJ (2019). The Crohn’s disease polymorphism,
- 28 ATG16L1 T300A, alters the gut microbiota and enhances the local Th1/Th17 response.
- 29 **Elife.** 8(Cd): 1–28. doi: 10.7554/eLife.39982.
- 30 18. Gholami M, M. Amoli M, and Sharifi F (2019). Overall corrections and assessments
- 31 of “Correlations between TLR polymorphisms and inflammatory bowel disease: a meta-
- 32 analysis of 49 case-control studies.” **Immunol Res.** 67(4–5): 301–303. doi:
- 33 10.1007/s12026-019-09092-w.
- 34 19. Sartor RB (2006). Mechanisms of disease: Pathogenesis of Crohn’s disease and
- 35 ulcerative colitis. **Nat Clin Pract Gastroenterol Hepatol.** 3(7): 390–407. doi:
- 36 10.1038/ncpgasthep0528.
- 37 20. Sepúlveda SE, Beltrán CJ, Peralta A, Rivas P, Rojas N, Figueroa C, Quera R, and

- 1 Hermoso MA (2008). [Inflammatory bowel diseases: an immunological approach]. **Rev**  
2 **Med Chil.** 136(3): 367–75. doi: /S0034-98872008000300014.
- 3 21. Karczewski J, Poniedzialek B, Rzymiski P, Rychlewska-Hańczewska A, Adamski Z,  
4 and Wiktorowicz K (2014). The effect of cigarette smoking on the clinical course of  
5 inflammatory bowel disease. **Prz Gastroenterol.** 9(3): 153–159. doi:  
6 10.5114/pg.2014.43577.
- 7 22. Martin TD, Chan SSM, and Hart AR (2015). Environmental Factors in the Relapse  
8 and Recurrence of Inflammatory Bowel Disease: A Review of the Literature. **Dig Dis**  
9 **Sci.** 60(5): 1396–1405. doi: 10.1007/s10620-014-3437-3.
- 10 23. O’Toole A, and Korzenik J (2014). Environmental triggers for IBD. **Curr**  
11 **Gastroenterol Rep.** 16(7). doi: 10.1007/s11894-014-0396-y.
- 12 24. Sokol H, Seksik P, Furet JP, Firmesse O, Nion-Larmurier I, Beaugerie L, Cosnes J,  
13 Corthier G, Marteau P, and Doraé J (2009). Low counts of faecalibacterium prausnitzii  
14 in colitis microbiota. **Inflamm Bowel Dis.** 15(8): 1183–1189. doi: 10.1002/ibd.20903.
- 15 25. Machiels K, Joossens M, Sabino J, De Preter V, Arijs I, Eeckhaut V, Ballet V, Claes  
16 K, Van Immerseel F, Verbeke K, Ferrante M, Verhaegen J, Rutgeerts P, and Vermeire  
17 S (2014). A decrease of the butyrate-producing species *roseburia hominis* and  
18 *faecalibacterium prausnitzii* defines dysbiosis in patients with ulcerative colitis. **Gut.**  
19 63(8): 1275–1283. doi: 10.1136/gutjnl-2013-304833.
- 20 26. Darfeuille-Michaud A, Boudeau J, Bulois P, Neut C, Glasser AL, Barnich N, Bringer  
21 MA, Swidsinski A, Beaugerie L, and Colombel JF (2004). High prevalence of adherent-  
22 invasive *Escherichia coli* associated with ileal mucosa in Crohn’s disease.  
23 **Gastroenterology.** 127(2): 412–421. doi: 10.1053/j.gastro.2004.04.061.
- 24 27. Small CLN, Reid-Yu SA, McPhee JB, and Coombes BK (2013). Persistent infection  
25 with Crohn’s disease-associated adherent-invasive *Escherichia coli* leads to chronic  
26 inflammation and intestinal fibrosis. **Nat Commun.** 4: 1–12. doi: 10.1038/ncomms2957.
- 27 28. Rigottier-Gois L (2013). Dysbiosis in inflammatory bowel diseases: The oxygen  
28 hypothesis. **ISME J.** 7(7): 1256–1261. doi: 10.1038/ismej.2013.80.
- 29 29. Albenberg L, Esipova T, Judge C, Bittinger K, Chen J, Laughlin A, Grunberg S,  
30 Baldassano R, Lewis J, Li H, Thom S, Bushman F, Vinogradov S, and Wu G (2015).  
31 Correlation Between Intraluminal Oxygen gradient and the microbiome.  
32 **Gastroenterology.** 147(5): 1055–1063. doi: 10.1053/j.gastro.2014.07.020.
- 33 30. Lepage P, Hösler R, Spehlmann ME, Rehman A, Zvirbliene A, Begun A, Ott S,  
34 Kupcinskis L, Doré J, Raedler A, and Schreiber S (2011). Twin study indicates loss of  
35 interaction between microbiota and mucosa of patients with ulcerative colitis.  
36 **Gastroenterology.** 141(1): 227–236. doi: 10.1053/j.gastro.2011.04.011.
- 37 31. Morgan XC, Tickle TL, Sokol H, Gevers D, Devaney KL, Ward D V., Reyes JA,

- 1 Shah SA, LeLeiko N, Snapper SB, Bousvaros A, Korzenik J, Sands BE, Xavier RJ, and  
2 Huttenhower C (2012). Dysfunction of the intestinal microbiome in inflammatory bowel  
3 disease and treatment. **Genome Biol.** 13(9). doi: 10.1186/gb-2012-13-9-r79.
- 4 32. Zoetendal EG, Von Wright A, Vilpponen-Salmela T, Ben-Amor K, Akkermans ADL,  
5 and De Vos WM (2002). Mucosa-associated bacteria in the human gastrointestinal  
6 tract are uniformly distributed along the colon and differ from the community recovered  
7 from feces. **Appl Environ Microbiol.** 68(7): 3401–3407. doi: 10.1128/AEM.68.7.3401-  
8 3407.2002.
- 9 33. Eckburg PB, Bik EM, Bernstein CN, Purdom E, Dethlefsen L, Sargent M, Gill SR,  
10 Nelson KE, and Relman DA (2005). Diversity of the human intestinal microbial flora.  
11 **Science.** 308(5728): 1635–8. doi: 10.1126/science.1110591.
- 12 34. Ingala MR, Simmons NB, Wultsch C, Krampis K, Speer KA, and Perkins SL (2018).  
13 Comparing microbiome sampling methods in a wild mammal: Fecal and intestinal  
14 samples record different signals of host ecology, evolution. **Front Microbiol.** 9(MAY):  
15 1–13. doi: 10.3389/fmicb.2018.00803.
- 16 35. Willing BP, Dicksved J, Halfvarson J, Andersson AF, Lucio M, Zheng Z, Järnerot G,  
17 Tysk C, Jansson JK, and Engstrand L (2010). A pyrosequencing study in twins shows  
18 that gastrointestinal microbial profiles vary with inflammatory bowel disease  
19 phenotypes. **Gastroenterology.** 139(6): 1844-1854.e1. doi:  
20 10.1053/j.gastro.2010.08.049.
- 21 36. Gevers D et al. (2014). The treatment-naive microbiome in new-onset Crohn's  
22 disease. **Cell Host Microbe.** 15(3): 382–392. doi: 10.1016/j.chom.2014.02.005.
- 23 37. Vidal R, Ginard D, Khorrami S, Mora-Ruiz M, Munoz R, Heroso M, Díaz S,  
24 Cifuentes A, Orfila A, and Rosselló-Móra R (2015). Crohn associated microbial  
25 communities associated to colonic mucosal biopsies in patients of the western  
26 Mediterranean. **Syst Appl Microbiol.** 38(6): 442–452. doi:  
27 10.1016/j.syapm.2015.06.008.
- 28 38. Ludwig W et al. (2004). ARB: A software environment for sequence data. **Nucleic  
29 Acids Res.** 32(4): 1363–1371. doi: 10.1093/nar/gkh293.
- 30 39. Mora-Ruiz MDR, Font-Verdera F, Orfila A, Rita J, and Rosselló-Móra R (2016).  
31 Endophytic microbial diversity of the halophyte *Arthrocnemum macrostachyum* across  
32 plant compartments. **FEMS Microbiol Ecol.** 92(9): 1–10. doi: 10.1093/femsec/fiw145.
- 33 40. Wang F, Kaplan JL, Gold BD, Bhasin MK, Ward NL, Kellermayer R, Kirschner BS,  
34 Heyman MB, Dowd SE, Cox SB, Dogan H, Steven B, Ferry GD, Cohen SA,  
35 Baldassano RN, Moran CJ, Garnett EA, Drake L, Otu HH, Mirny LA, Libermann TA,  
36 Winter HS, and Korolev KS (2016). Detecting Microbial Dysbiosis Associated with  
37 Pediatric Crohn Disease Despite the High Variability of the Gut Microbiota. **Cell Rep.**

- 1 14(4): 945–955. doi: 10.1016/j.celrep.2015.12.088.
- 2 41. Schirmer M, Denson L, Vlamakis H, Franzosa EA, Thomas S, Gotman NM, Rufo P,  
3 Baker SS, Sauer C, Markowitz J, Pfeifferkorn M, Oliva-Hemker M, Rosh J, Otley A,  
4 Boyle B, Mack D, Baldassano R, Keljo D, LeLeiko N, Heyman M, Griffiths A, Patel AS,  
5 Noe J, Kugathasan S, Walters T, Huttenhower C, Hyams J, and Xavier RJ (2018).  
6 Compositional and Temporal Changes in the Gut Microbiome of Pediatric Ulcerative  
7 Colitis Patients Are Linked to Disease Course. **Cell Host Microbe**. 24(4): 600-610.e4.  
8 doi: 10.1016/j.chom.2018.09.009.
- 9 42. Clooney AG, Eckenberger J, Laserna-Mendieta E, Sexton KA, Bernstein MT,  
10 Vagianos K, Sargent M, Ryan FJ, Moran C, Sheehan D, Sleator RD, Targownik LE,  
11 Bernstein CN, Shanahan F, and Claesson MJ (2020). Ranking microbiome variance in  
12 inflammatory bowel disease: a large longitudinal intercontinental study. **Gut**. gutjnl-  
13 2020-321106. doi: 10.1136/gutjnl-2020-321106.
- 14 43. Alam MT, Amos GCA, Murphy ARJ, Murch S, Wellington EMH, and Arasaradnam  
15 RP (2020). Microbial imbalance in inflammatory bowel disease patients at different  
16 taxonomic levels. **Gut Pathog**. 12(1): 1–8. doi: 10.1186/s13099-019-0341-6.
- 17 44. Kedia S, Ghosh TS, Jain S, Desigamani A, Kumar A, Gupta V, Bopanna S, Yadav  
18 DP, Goyal S, Makharia G, Travis SPL, Das B, and Ahuja V (2020). Gut microbiome  
19 diversity in acute severe colitis is distinct from mild to moderate ulcerative colitis. **J**  
20 **Gastroenterol Hepatol**. 1–9. doi: 10.1111/jgh.15232.
- 21 45. Fang X, Vázquez-Baeza Y, Elijah E, Vargas F, Ackermann G, Humphrey G, Lau R,  
22 Weldon KC, Sanders JG, Panitchpakdi M, Carpenter C, Jarmusch AK, Neill J, Miralles  
23 A, Dulai P, Singh S, Tsai M, Swafford AD, Smarr L, Boyle DL, Palsson BO, Chang JT,  
24 Dorrestein PC, Sandborn WJ, Knight R, and Boland BS (2020). Gastrointestinal  
25 Surgery for Inflammatory Bowel Disease Persistently Lowers Microbiome and  
26 Metabolome Diversity. **Inflamm Bowel Dis**. XX(Xx): 1–14. doi: 10.1093/ibd/izaa262.
- 27 46. Dey N, Soergel DAW, Repo S, and Brenner SE (2013). Association of gut  
28 microbiota with post-operative clinical course in Crohn’s disease. **BMC Gastroenterol**.  
29 13(1): 1. doi: 10.1186/1471-230X-13-131.
- 30 47. Sievert C, Parmer C, Hocking T, Chamberlain S, Corvellec M, and Despouy P  
31 (2020). Plotly: Create Interactive Web Graphics via “plotly.js.” Available at  
32 <https://cran.r-project.org/package=plotly> .
- 33 48. R Core Team (2014). R: A Language and Environment for Statistical Computing.  
34 2673.
- 35 49. Lloyd-Price J et al. (2019). Multi-omics of the gut microbial ecosystem in  
36 inflammatory bowel diseases. **Nature**. 569(7758): 655–662. doi: 10.1038/s41586-019-  
37 1237-9.

- 1 50. Furusawa Y et al. (2013). Commensal microbe-derived butyrate induces the  
2 differentiation of colonic regulatory T cells. **Nature**. 504(7480): 446–450. doi:  
3 10.1038/nature12721.
- 4 51. Peng L, Li Z-R, Green RS, Holzman IR, and Lin J (2009). Butyrate Enhances the  
5 Intestinal Barrier by Facilitating Tight Junction Assembly via Activation of AMP-  
6 Activated Protein Kinase in Caco-2 Cell Monolayers. **J Nutr**. 139(9): 1619–1625. doi:  
7 10.3945/jn.109.104638.
- 8 52. Friedman J, and Alm EJ (2012). Inferring Correlation Networks from Genomic  
9 Survey Data. **PLoS Comput Biol**. 8(9): 1–11. doi: 10.1371/journal.pcbi.1002687.
- 10 53. Kurtz ZD, Müller CL, Miraldi ER, Littman DR, Blaser MJ, and Bonneau RA (2015).  
11 Sparse and Compositionally Robust Inference of Microbial Ecological Networks. **PLoS**  
12 **Comput Biol**. 11(5): 1–25. doi: 10.1371/journal.pcbi.1004226.
- 13 54. Hughes ER, Winter MG, Duerkop BA, Spiga L, Furtado de Carvalho T, Zhu W,  
14 Gillis CC, Büttner L, Smoot MP, Behrendt CL, Cherry S, Santos RL, Hooper L V., and  
15 Winter SE (2017). Microbial Respiration and Formate Oxidation as Metabolic  
16 Signatures of Inflammation-Associated Dysbiosis. **Cell Host Microbe**. 21(2): 208–219.  
17 doi: 10.1016/j.chom.2017.01.005.
- 18 55. Henson MA, and Phalak P (2017). Microbiota dysbiosis in inflammatory bowel  
19 diseases: In silico investigation of the oxygen hypothesis. **BMC Syst Biol**. 11(1): 1–15.  
20 doi: 10.1186/s12918-017-0522-1.
- 21 56. Pascal V, Pozuelo M, Borruel N, Casellas F, Campos D, Santiago A, Martinez X,  
22 Varela E, Sarrabayrouse G, Machiels K, Vermeire S, Sokol H, Guarner F, and  
23 Manichanh C (2017). A microbial signature for Crohn’s disease. **Gut**. 66(5): 813–822.  
24 doi: 10.1136/gutjnl-2016-313235.
- 25 57. Zmora N, Zilberman-Schapira G, Suez J, Mor U, Dori-Bachash M, Bashiardes S,  
26 Kotler E, Zur M, Regev-Lehavi D, Brik RBZ, Federici S, Cohen Y, Linevsky R,  
27 Rothschild D, Moor AE, Ben-Moshe S, Harmelin A, Itzkovitz S, Maharshak N, Shibolet  
28 O, Shapiro H, Pevsner-Fischer M, Sharon I, Halpern Z, Segal E, and Elinav E (2018).  
29 Personalized Gut Mucosal Colonization Resistance to Empiric Probiotics Is Associated  
30 with Unique Host and Microbiome Features. **Cell**. 174(6): 1388-1405.e21. doi:  
31 10.1016/j.cell.2018.08.041.
- 32 58. Becker C, Neurath MF, and Wirtz S (2015). The intestinal microbiota in  
33 inflammatory bowel disease. **ILAR J**. 56(2): 192–204. doi: 10.1093/ilar/ilv030.
- 34 59. Olaisen M, Flatberg A, Granlund A van B, Røyset ES, Martinsen TC, Sandvik AK,  
35 and Fossmark R (2020). Bacterial Mucosa-associated Microbiome in Inflamed and  
36 Proximal Noninflamed Ileum of Patients With Crohn’s Disease. **Inflamm Bowel Dis**.  
37 XX(Xx): 1–13. doi: 10.1093/ibd/izaa107.

- 1 60. Högenauer C, Langner C, Beubler E, Lippe IT, Schicho R, Gorkiewicz G, Krause R,  
2 Gerstgrasser N, Krejs GJ, and Hinterleitner TA (2006). *Klebsiella oxytoca* as a  
3 Causative Organism of Antibiotic-Associated Hemorrhagic Colitis. **N Engl J Med.**  
4 355(23): 2418–2426. doi: 10.1056/NEJMoa054765.
- 5 61. Chen J, Cachay ER, and Hunt GC (2004). *Klebsiella oxytoca*: a rare cause of  
6 severe infectious colitis: first North American case report. **Gastrointest Endosc.** 60(1):  
7 142–145. doi: 10.1016/S0016-5107(04)01537-8.
- 8 62. Henke MT, Kenny DJ, Cassilly CD, Vlamakis H, Xavier RJ, and Clardy J (2019).  
9 *Ruminococcus gnavus*, a member of the human gut microbiome associated with  
10 Crohn’s disease, produces an inflammatory polysaccharide. **Proc Natl Acad Sci U S**  
11 **A.** 116(26): 12672–12677. doi: 10.1073/pnas.1904099116.
- 12 63. Hall AB, Yassour M, Sauk J, Garner A, Jiang X, Arthur T, Lagoudas GK, Vatanen  
13 T, Fornelos N, Wilson R, Bertha M, Cohen M, Garber J, Khalili H, Gevers D,  
14 Ananthakrishnan AN, Kugathasan S, Lander ES, Blainey P, Vlamakis H, Xavier RJ,  
15 and Huttenhower C (2017). A novel *Ruminococcus gnavus* clade enriched in  
16 inflammatory bowel disease patients. **Genome Med.** 9(1): 1–12. doi: 10.1186/s13073-  
17 017-0490-5.
- 18 64. Png CW, Lindén SK, Gilshenan KS, Zoetendal EG, McSweeney CS, Sly LI,  
19 McGuckin MA, and Florin THJ (2010). Mucolytic bacteria with increased prevalence in  
20 IBD mucosa augment in vitro utilization of mucin by other bacteria. **Am J**  
21 **Gastroenterol.** 105(11): 2420–2428. doi: 10.1038/ajg.2010.281.
- 22 65. Balish E, and Warner T (2002). *Enterococcus faecalis* induces inflammatory bowel  
23 disease in interleukin-10 knockout mice. **Am J Pathol.** 160(6): 2253–2257. doi:  
24 10.1016/S0002-9440(10)61172-8.
- 25 66. Steck N, Hoffmann M, Sava IG, Kim SC, Hahne H, Tonkonogy SL, Mair K, Krueger  
26 D, Pruteanu M, Shanahan F, Vogelmann R, Schemann M, Kuster B, Sartor RB, and  
27 Haller D (2011). *Enterococcus faecalis* metalloprotease compromises epithelial barrier  
28 and contributes to intestinal inflammation. **Gastroenterology.** 141(3): 959–971. doi:  
29 10.1053/j.gastro.2011.05.035.
- 30 67. Steck N, Mueller K, Schemann M, and Haller D (2012). Bacterial proteases in IBD  
31 and IBS. **Gut.** 61(11): 1610–1618. doi: 10.1136/gutjnl-2011-300775.
- 32 68. Wagner J, Short K, Catto-Smith AG, Cameron DJS, Bishop RF, and Kirkwood CD  
33 (2008). Identification and Characterisation of *Pseudomonas* 16S Ribosomal DNA from  
34 Ileal Biopsies of Children with Crohn’s Disease. **PLoS One.** 3(10). doi:  
35 10.1371/journal.pone.0003578.
- 36 69. Deng Q, and Barbieri JT (2008). Molecular mechanisms of the cytotoxicity of ADP-  
37 ribosylating toxins. **Annu Rev Microbiol.** 62: 271–288. doi:

- 1 10.1146/annurev.micro.62.081307.162848.
- 2 70. Nagao-Kitamoto H, and Kamada N (2017). Host-microbial cross-talk in  
3 inflammatory bowel disease. **Immune Netw.** 17(1): 1–12. doi: 10.4110/in.2017.17.1.1.
- 4 71. Okayasu I, Hatakeyama S, Yamada M, Ohkusa T, Inagaki Y, and Nakaya R (1990).  
5 A novel method in the induction of reliable experimental acute and chronic ulcerative  
6 colitis in mice. **Gastroenterology.** 98(3): 694–702. doi: 10.1016/0016-5085(90)90290-  
7 H.
- 8 72. Kolho KL, Korpela K, Jaakkola T, Pichai MVA, Zoetendal EG, Salonen A, and De  
9 Vos WM (2015). Fecal microbiota in pediatric inflammatory bowel disease and its  
10 relation to inflammation. **Am J Gastroenterol.** 110(6): 921–930. doi:  
11 10.1038/ajg.2015.149.
- 12 73. Louis P, and Flint HJ (2009). Diversity, metabolism and microbial ecology of  
13 butyrate-producing bacteria from the human large intestine. **FEMS Microbiol Lett.**  
14 294(1): 1–8. doi: 10.1111/j.1574-6968.2009.01514.x.
- 15 74. Takahashi K, Nishida A, Fujimoto T, Fujii M, Shioya M, Imaeda H, Inatomi O,  
16 Bamba S, Andoh A, and Sugimoto M (2016). Reduced Abundance of Butyrate-  
17 Producing Bacteria Species in the Fecal Microbial Community in Crohn’s Disease.  
18 **Digestion.** 93(1): 59–65. doi: 10.1159/000441768.
- 19 75. Segain JP, Raingeard de la Blétière D, Bourreille A, Leray V, Gervois N, Rosales  
20 C, Ferrier L, Bonnet C, Blottièrè HM, and Galmiche JP (2000). Butyrate inhibits  
21 inflammatory responses through NFkappaB inhibition: implications for Crohn’s disease.  
22 **Gut.** 47(3): 397–403. 10940278.
- 23 76. Cao Y, Shen J, and Ran ZH (2014). Association between faecalibacterium  
24 prausnitzii reduction and inflammatory bowel disease: A meta-analysis and systematic  
25 review of the literature. **Gastroenterol Res Pract.** 2014. doi: 10.1155/2014/872725.
- 26 77. Galazzo G, Tedjo DI, Wintjens DSJ, Savelkoul PHM, Masclee AAM, Bodelier AGL,  
27 Pierik MJ, Jonkers DMAE, and Penders J (2019). Faecal Microbiota Dynamics and  
28 their Relation to Disease Course in Crohn’s Disease. **J Crohn’s Colitis.** 13(10): 1273–  
29 1282. doi: 10.1093/ecco-jcc/jjz049.
- 30 78. Ananthakrishnan AN (2020). Microbiome-Based Biomarkers for IBD. **Inflamm**  
31 **Bowel Dis.** 26(10): 1463–1469. doi: 10.1093/ibd/izaa071.
- 32 79. Guo S, Lu Y, Xu B, Wang W, Xu J, and Zhang G (2019). A simple fecal bacterial  
33 marker panel for the diagnosis of Crohn’s disease. **Front Microbiol.** 10(JUN): 1–9. doi:  
34 10.3389/fmicb.2019.01306.
- 35 80. Wright EK, Kamm MA, Wagner J, Teo SM, Cruz P De, Hamilton AL, Ritchie KJ,  
36 Inouye M, and Kirkwood CD (2017). Microbial Factors Associated with Postoperative  
37 Crohn’s Disease Recurrence. **J Crohns Colitis.** 11(2): 191–203. doi: 10.1093/ecco-



- 1 jcc/jjw136.
- 2 81. Schloss PD, Westcott SL, Ryabin T, Hall JR, Hartmann M, Hollister EB, Lesniewski  
3 RA, Oakley BB, Parks DH, Robinson CJ, Sahl JW, Stres B, Thallinger GG, Van Horn  
4 DJ, and Weber CF (2009). Introducing mothur: Open-source, platform-independent,  
5 community-supported software for describing and comparing microbial communities.  
6 **Appl Environ Microbiol.** 75(23): 7537–7541. doi: 10.1128/AEM.01541-09.
- 7 82. Caporaso JG, Kuczynski J, Stombaugh J, Bittinger K, Bushman FD, Costello EK,  
8 Fierer N, Peña AG, Goodrich JK, Gordon JI, Huttley GA, Kelley ST, Knights D, Koenig  
9 JE, Ley RE, Lozupone CA, McDonald D, Muegge BD, Pirrung M, Reeder J, Sevinsky  
10 JR, Turnbaugh PJ, Walters WA, Widmann J, Yatsunencko T, Zaneveld J, and Knight R  
11 (2010). correspondence QIIME allows analysis of high- throughput community  
12 sequencing data Intensity normalization improves color calling in SOLiD sequencing.  
13 **Nat Publ Gr.** 7(5): 335–336. doi: 10.1038/nmeth0510-335.
- 14 83. Pruesse E, Peplies J, and Glöckner FO (2012). SINA: Accurate high-throughput  
15 multiple sequence alignment of ribosomal RNA genes. **Bioinformatics.** 28(14): 1823–  
16 1829. doi: 10.1093/bioinformatics/bts252.
- 17 84. Quast C, Pruesse E, Yilmaz P, Gerken J, Schweer T, Yarza P, Peplies J, and  
18 Glöckner FO (2013). The SILVA ribosomal RNA gene database project: Improved data  
19 processing and web-based tools. **Nucleic Acids Res.** 41(D1): 590–596. doi:  
20 10.1093/nar/gks1219.
- 21 85. Dhariwal A, Chong J, Habib S, King IL, Agellon LB, and Xia J (2017).  
22 MicrobiomeAnalyst: A web-based tool for comprehensive statistical, visual and meta-  
23 analysis of microbiome data. **Nucleic Acids Res.** 45(W1): W180–W188. doi:  
24 10.1093/nar/gkx295.
- 25 86. Warnes GR, Bolker B, Bonebakker L, Gentleman R, Huber W, Lumley T, Maechler  
26 M, Magnusson A, Moeller S, Schwartz M, and Venables B (2016). R Package ‘ gplots .’  
27 Available at <https://cran.r-project.org/web/packages/gplots/gplots.pdf> .
- 28 87. Menon R, Ramanan V, and Korolev KS (2018). Interactions between species  
29 introduce spurious associations in microbiome studies. **PLOS Comput Biol.** 14(1):  
30 e1005939. doi: 10.1371/journal.pcbi.1005939.
- 31 88. Segata N, Izard J, Waldron L, Gevers D, Miropolsky L, Garrett WS, and  
32 Huttenhower C (2011). Segata-LEfSe-gb-2011. .
- 33 89. Goksuluk D, Korkmaz S, Zararsiz G, and Karaagaoglu AE (2016). EasyROC: An  
34 interactive web-tool for roc curve analysis using r language environment. **R J.** 8(2):  
35 213–230. doi: 10.32614/rj-2016-042.
- 36 90. Demsar J, and Zupan B (2013). Orange: data mining fruitful and fun. **Informatica.**  
37 37(1): 55.



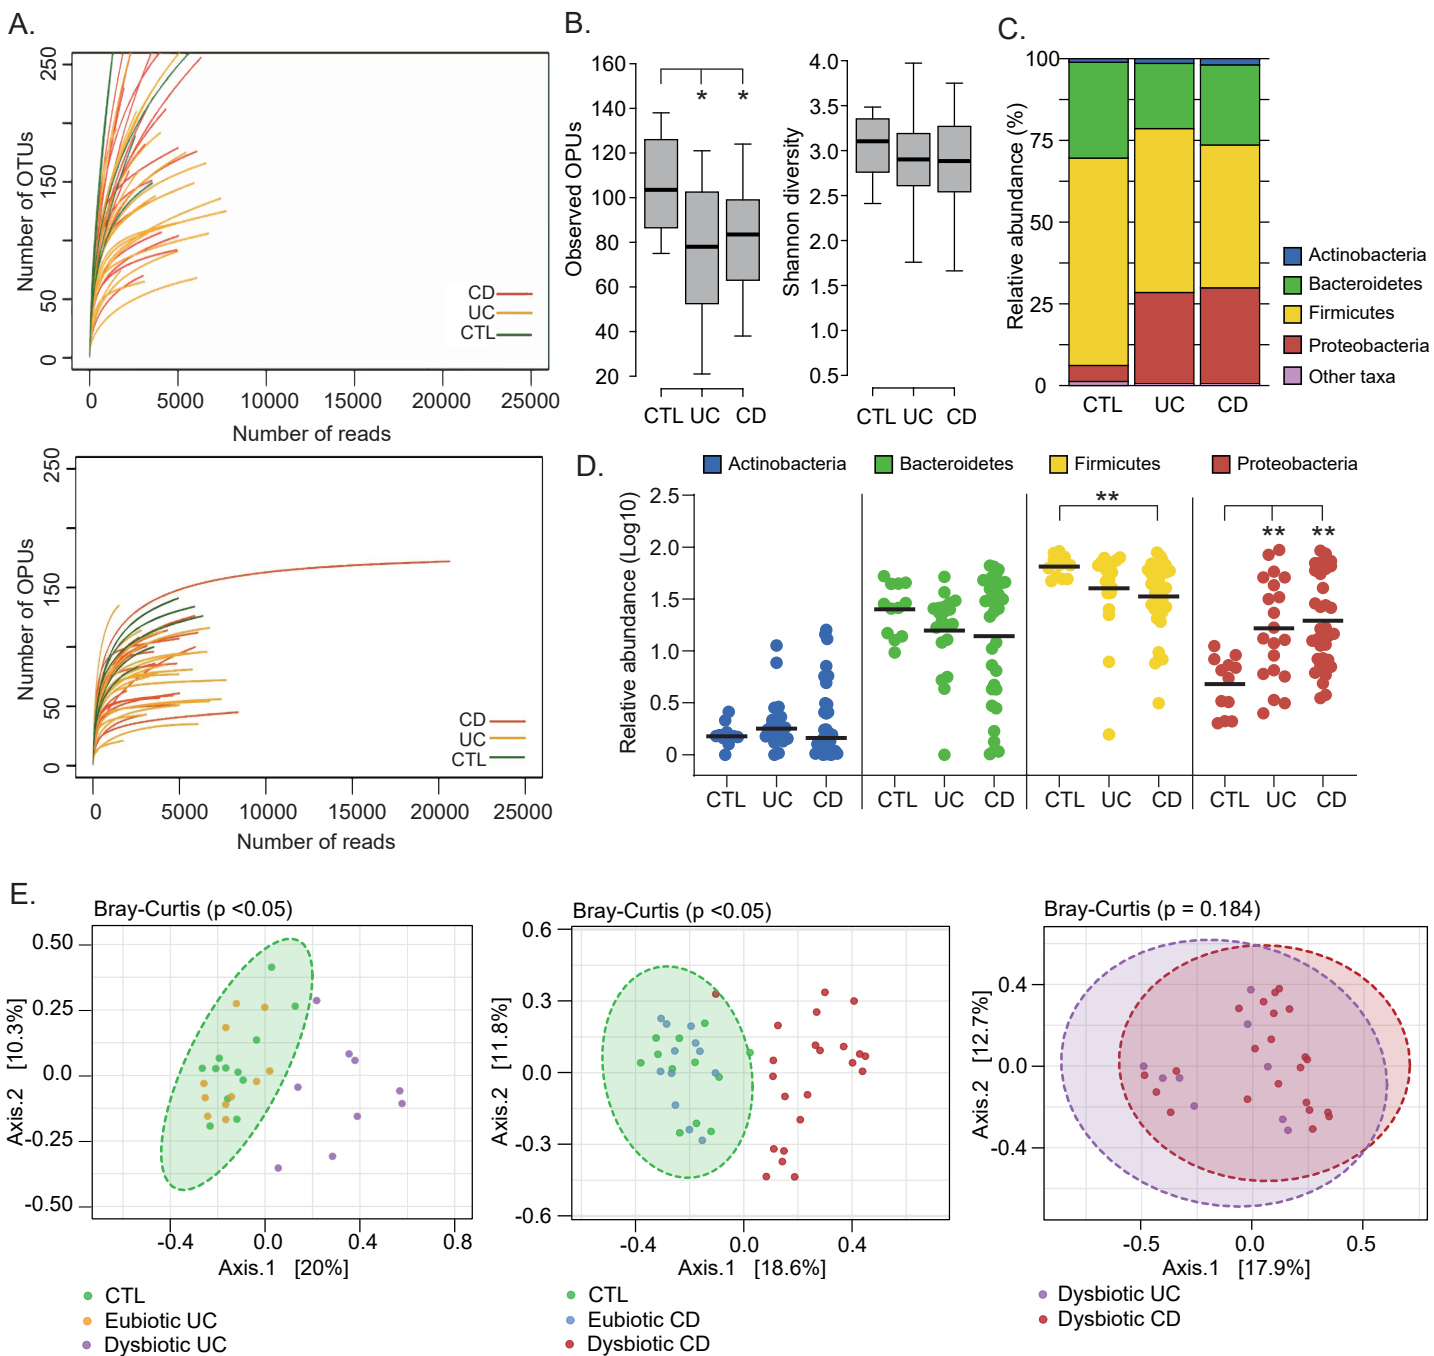

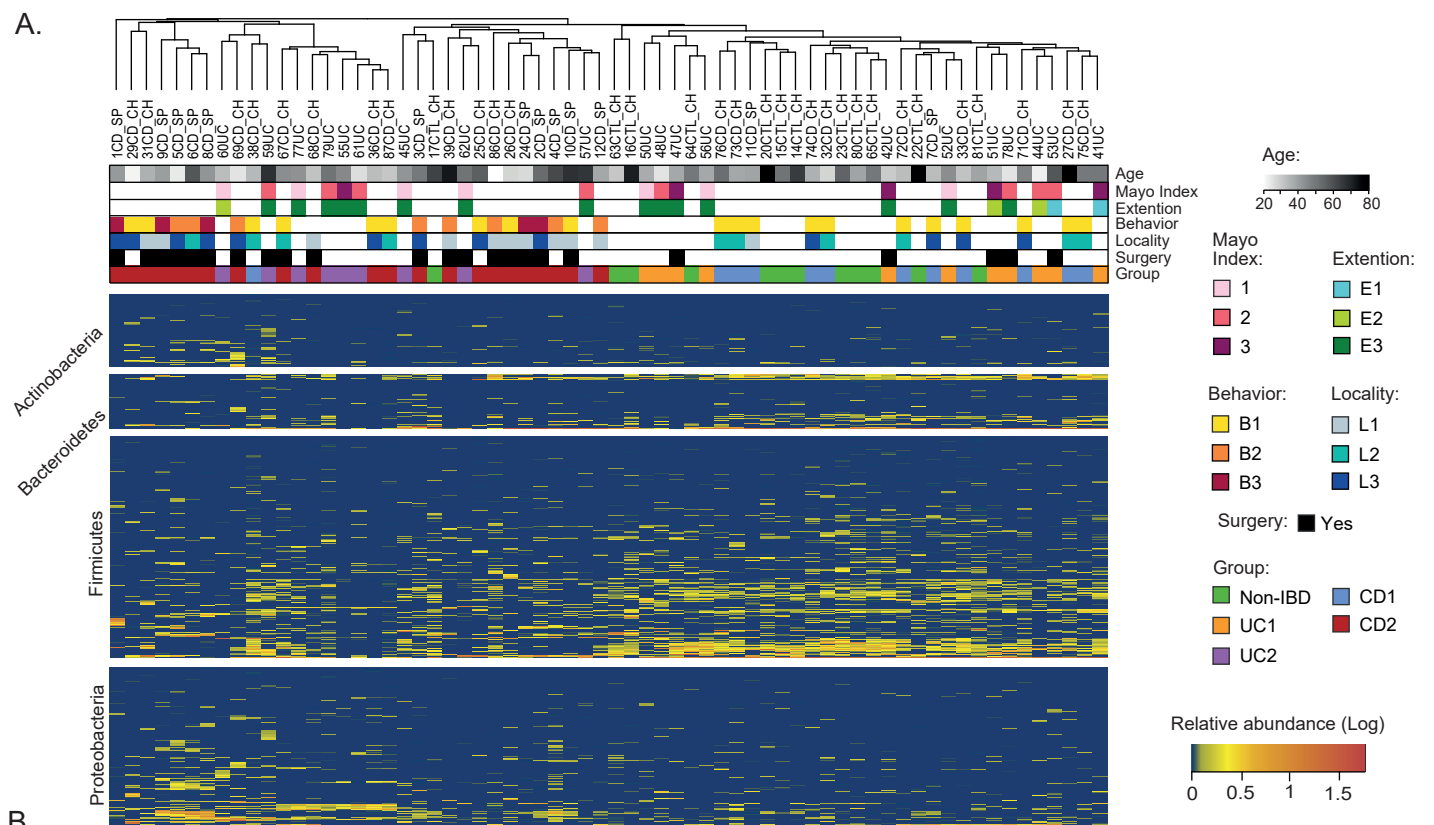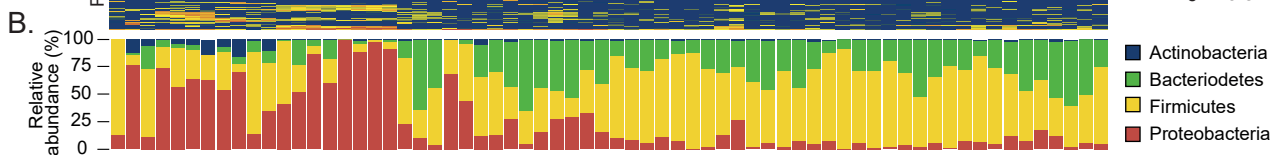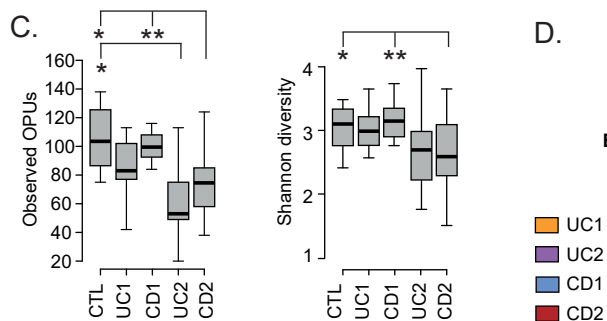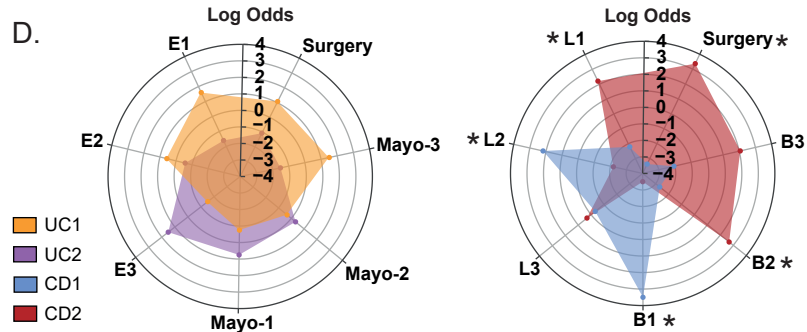

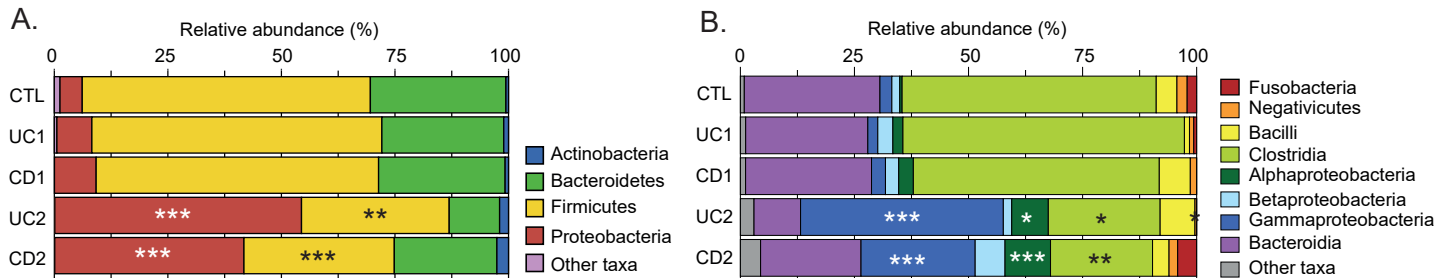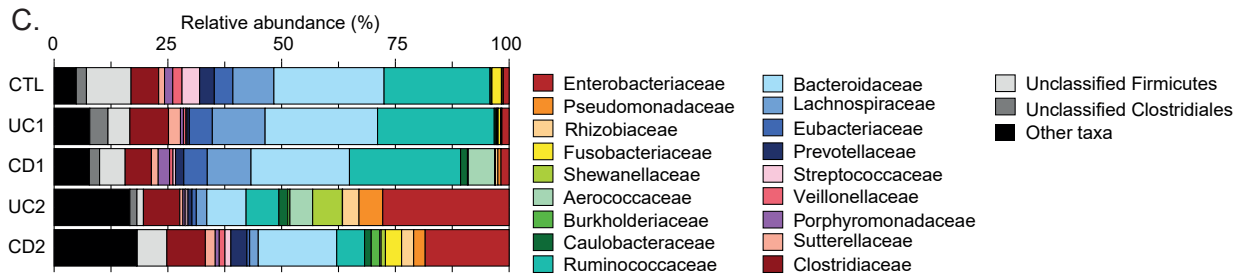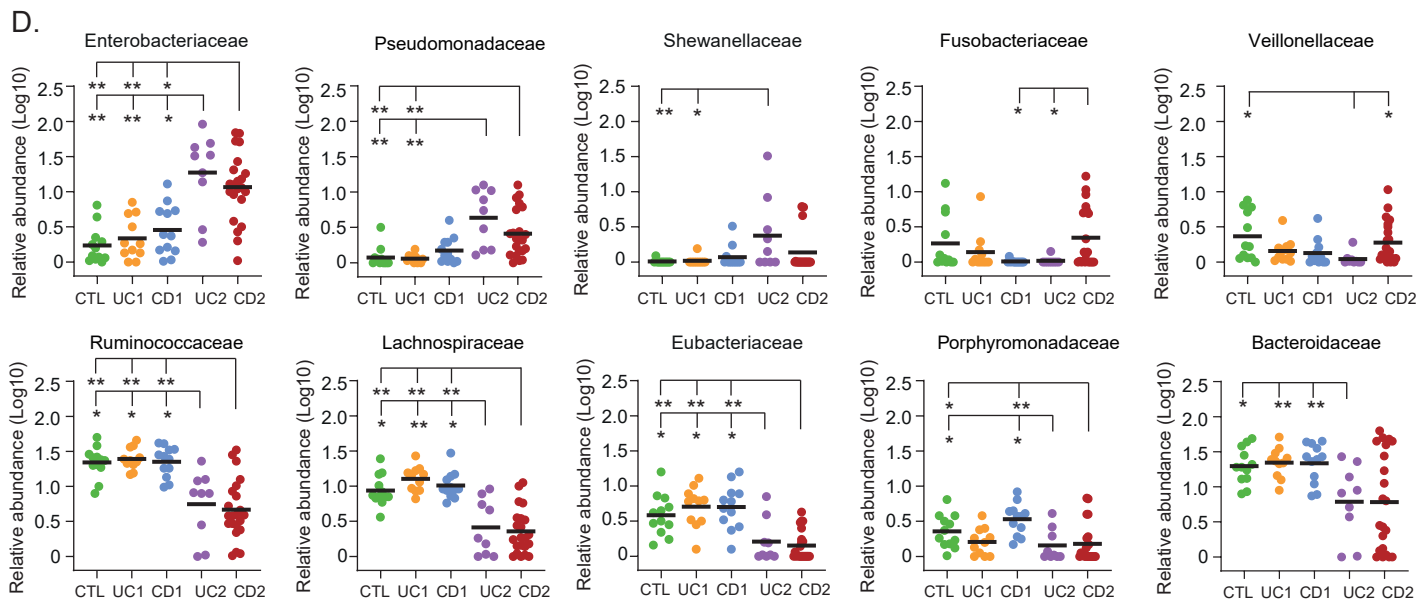

A.

Decreased in dysbiosis      Increased in dysbiosis

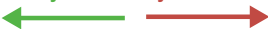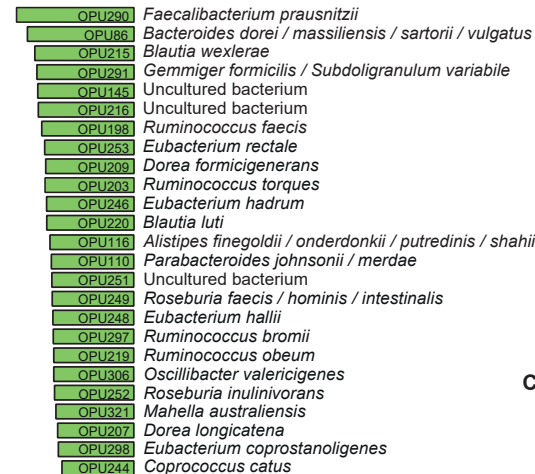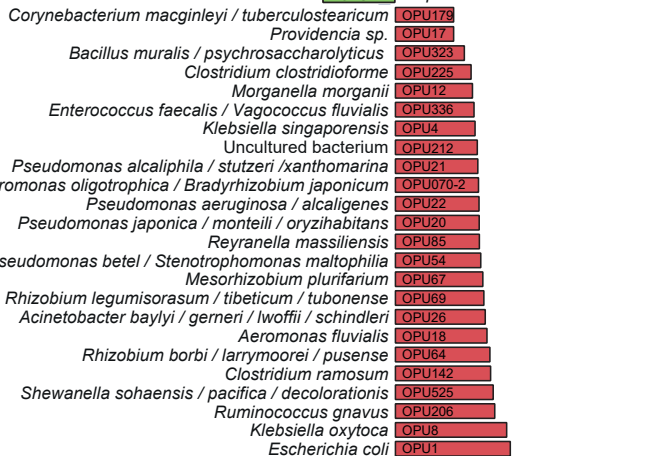

-6 -4 -2 0 2 4 6  
LDA scores (Log 10)

B.

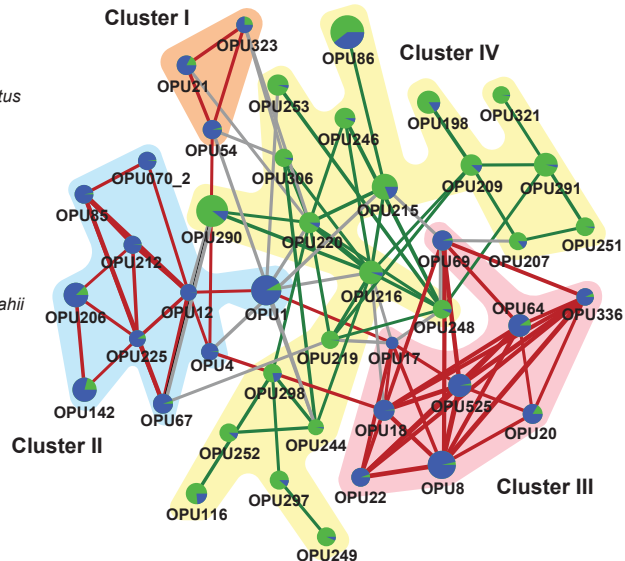

Relative abundances:

● IBD patients without dysbiosis (UC1 and CD1) and controls

● IBD patients with dysbiosis (UC2 and CD2)

Potential interactions:

— Negative correlation

— Positive correlation between biomarkers of IBD-associated dysbiosis

— Positive correlation between biomarkers of eubiotic status

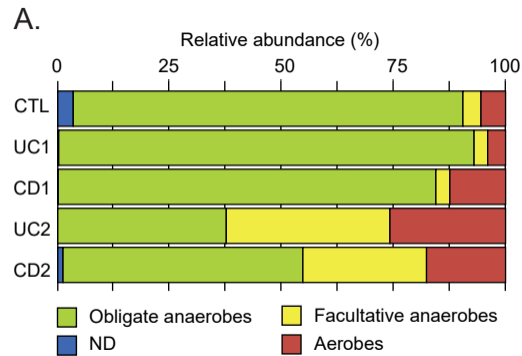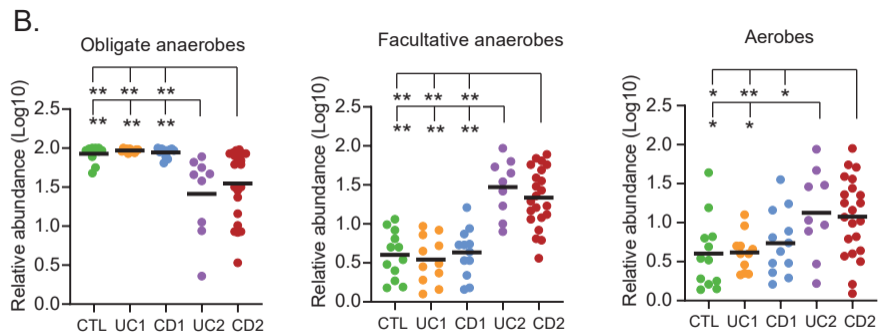

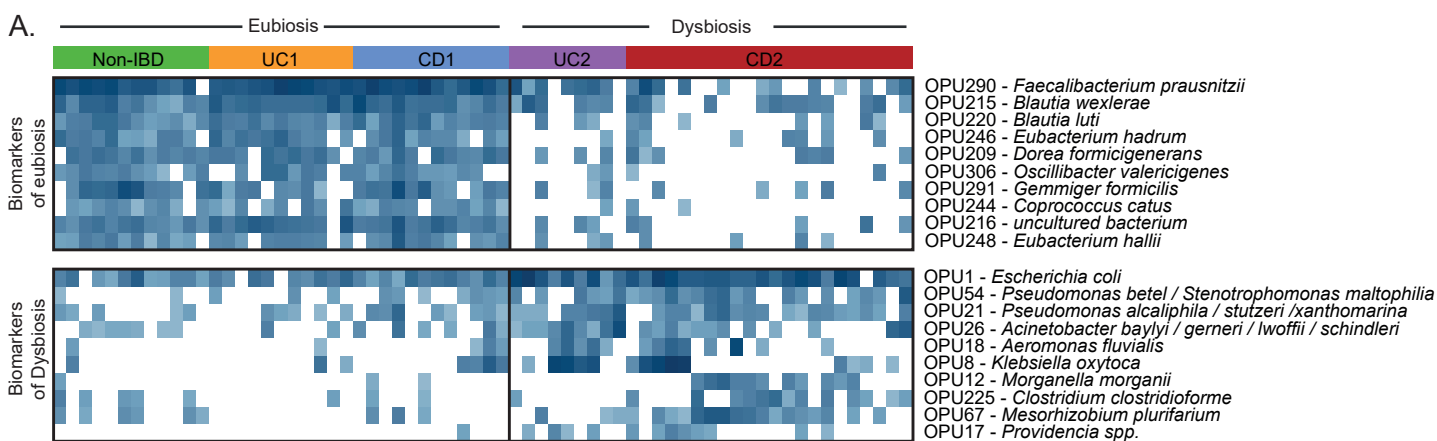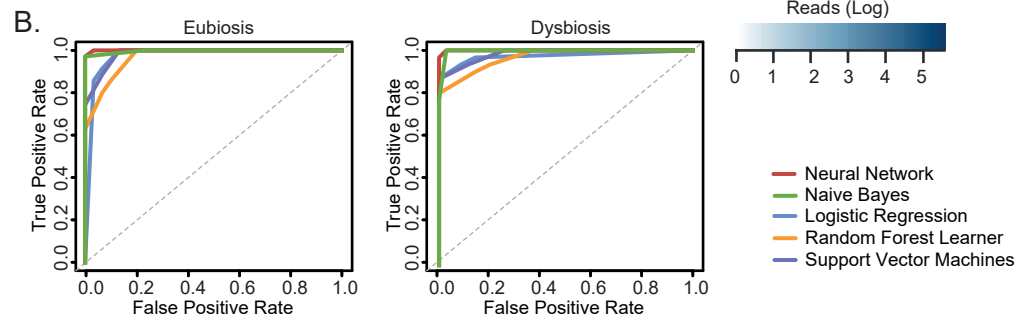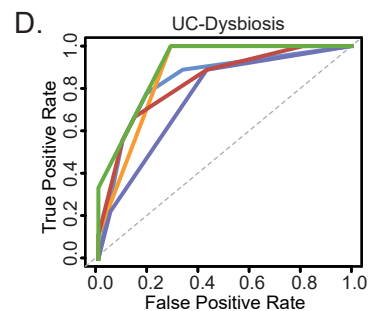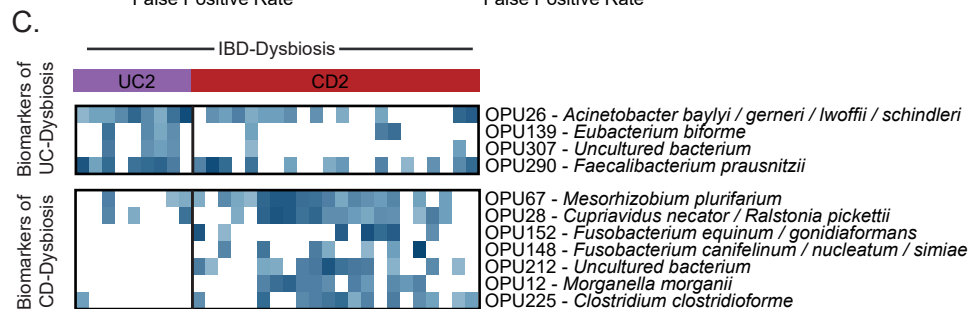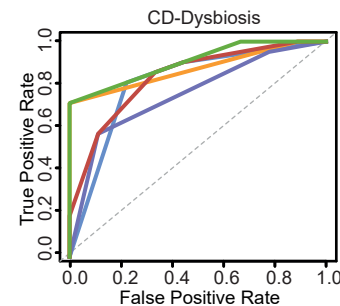

Source: https://www.biorxiv.org/content/10.1101/2021.01.04.425212v1.full.pdf
